# Supplementary material for: Trends and seasonal variability of ammonia across major biomes inferred from long-term series of ground-based and satellite measurements
Source: Copernicus journal article supplement (doi:10.5194/acp-2022-793), 2023-01-16
Supplement: Supplementary file [file acp-2022-793-AC4-supplement.pdf]

# Trends and seasonal variability of ammonia across major biomes in Western and Central Africa inferred from long-term series of ground-based and satellite measurements

Money Ossouhou<sup>1,2\*</sup>, Jonathan E. Hickman<sup>3</sup>, Lieven Clarisse<sup>4</sup>, Pierre-François Coheur<sup>4</sup>, Martin Van Damme<sup>4,5</sup>, Marcellin Adon<sup>2,6</sup>, Véronique Yoboué<sup>1</sup>, Eric Gardrat<sup>7</sup>, Maria Dias Alvès<sup>7</sup> and Corinne Galy-Lacaux<sup>7</sup>

<sup>1</sup>Department of Physics, University of Man, Man, Côte d'Ivoire

<sup>2</sup>Laboratoire des Sciences de la Matière, de l'Environnement et de l'Energie Solaire, Université Félix Houphouët-Boigny, Abidjan, Côte d'Ivoire

<sup>3</sup>NASA Goddard Institute for Space Studies, USA

<sup>4</sup>Université Libre de Bruxelles (ULB), Spectroscopy, Quantum Chemistry and Atmospheric Remote Sensing (SQUARES), Brussels, Belgium

<sup>5</sup>Royal Belgian Institute for Space Aeronomy, Brussels, Belgium

<sup>6</sup>Laboratoire des Sciences et Techniques de l'Environnement, Université Jean Lorougnon Guédé, Daloa, Côte d'Ivoire

<sup>7</sup>Laboratoire d'Aérodologie, Université Toulouse III Paul Sabatier, CNRS, France

\*Correspondence to: Money Ossouhou (ossouhoumoney@gmail.com)

**Abstract.** Ammonia (NH<sub>3</sub>) is the most abundant alkaline component in the atmosphere. Changes in NH<sub>3</sub> concentrations have important implications for atmospheric chemistry, air quality, and ecosystem integrity. We present a long-term ammonia (NH<sub>3</sub>) assessment in the Western and Central Africa region within the framework of the International Network to study Deposition and Atmospheric chemistry in Africa (INDAAF) program. We analyze seasonal variations and trends of NH<sub>3</sub> concentrations and total column densities along an African ecosystem transect spanning dry savannas in Banizoumbou, Niger and Katibougou, Mali, wet savannas in Djougou, Benin and Lamto, Côte d'Ivoire, and forests in Bomassa, Republic of Congo and Zoétéélé, Cameroon. We use a 21-year record of observations (1998-2018) from INDAAF passive samplers and 11-year record of observations (2008-2018) of atmospheric vertical column densities from the Infrared Atmospheric Sounding Interferometer (IASI) to evaluate NH<sub>3</sub> ground-based concentrations and total column densities, respectively. Climatic data (air temperature, rainfall amount and leaf area index), as well as ammonia emission data of biomass combustion from the fourth version of the Global Fire Emissions Database (GFED4) and anthropogenic sources from the Community Emissions Data System (CEDS), were compared with total NH<sub>3</sub> concentrations and total columns over the same periods. Annual mean ground-based NH<sub>3</sub> concentrations are around 5.7-5.8 ppb in dry savannas, 3.5-4.7 ppb in wet savannas and 3.4-5.6 ppb in forests. ~~These results suggest that NH<sub>3</sub> emissions from precipitation induced pulses and volatilization from animal excreta are important emission sources in dry savannas, and biomass burning and agricultural sources are important sources in wet savanna and forest ecosystems. NH<sub>3</sub> total column densities clearly show that the biomass burning source is the most important source in the Lamto wet savanna ecosystem.~~ Annual IASI NH<sub>3</sub> total column densities are ~~10.04-10.74~~  $10.04-10.74 \times 10^{15}$  molec cm<sup>-2</sup> in dry savanna, ~~16.05-~~

Mis en forme : Indice

35 ~~20.914~~  $\times 10^{15}$  molec cm<sup>-2</sup> in wet savanna and ~~12.43-13.851~~  $\times 10^{15}$  molec cm<sup>-2</sup> in forest stations. Non-parametric statistical  
Mann-Kendall trend tests applied to annual data show that ground-based NH<sub>3</sub> concentrations increase at Bomassa (+2.56% yr<sup>-1</sup>),  
but decrease at Zoétélé (-2.95% yr<sup>-1</sup>) over the 21-year period. The 11-year period of IASI NH<sub>3</sub> total column density  
measurements show yearly increasing trends at Katibougou (+3.4698% yr<sup>-1</sup>), and Djougou (+2.24% yr<sup>-1</sup>) and Zoétélé (+3.42%  
40 yr<sup>-1</sup>). ~~At Zoétélé, we calculated an increasing trend of leaf area index associated to a significant anticorrelation with ground-  
based NH<sub>3</sub> concentrations. Leaf area index increase could enhance deposition processes and could contribute to the decrease  
of ground-based NH<sub>3</sub> concentrations. From the outcome of our investigation, we conclude that air temperature, leaf area index  
and rainfall combined with biomass burning, agricultural and residential activities are the key drivers of atmospheric NH<sub>3</sub> in  
the INDAAF stations. The results also show that the drivers of trends in the (1) dry savanna of Katibougou is agriculture, (2)  
wet savanna of Djougou and Lamto are air temperature and agriculture, and (3) forest of Bomassa are leaf area index, air  
45 temperature, residential and agriculture.~~

Mis en forme : Français (France)

## 1 Introduction

Atmospheric nitrogen (N) compounds play an important role in all compartments of the critical zone (biosphere-atmosphere-  
hydrosphere) at the global scale. Since 2002, (Bouwman et al., 2002a) had claimed that in the new future, both acidification  
50 and eutrophication risks due to excess of N could significantly increase in Asia, Africa and South America, but decrease in  
North America and Western Europe. Reactive nitrogen (Nr) in the atmosphere, either reduced (NH<sub>x</sub> = NH<sub>3</sub> and NH<sub>4</sub><sup>+</sup>) or  
oxidized (NO<sub>x</sub>) forms, has a very different role. Ammonia (NH<sub>3</sub>), the inorganic form of Nr typically produced through the  
deprotonation of NH<sub>4</sub><sup>+</sup>, is the most abundant alkaline component in the atmosphere (Behera et al., 2013). In the atmosphere,  
NH<sub>3</sub> influences the abundance and chemical composition of sulfate particles, primarily from dimethyl sulfide (DMS) emissions  
55 arising from planktonic algae (Bouwman and Van Der Hoek, 1997). In the lower troposphere, NH<sub>3</sub> neutralizes a great portion  
of the acids produced by oxides of sulfur and nitrogen (Adon et al., 2010) and forms fine particulate matter (PM<sub>2.5</sub>) (Malm et  
al., 2004). Through wet or dry deposition to the surface, NH<sub>3</sub> can be detrimental over time due to an increased toxicity toward  
sensitive species of plants (Behera et al., 2013; Galloway et al., 2004), ecosystems (Erisman et al., 2013) and soils (Stevens et  
al., 2018). Different sources contribute to NH<sub>3</sub> emissions on the African continent, which in turn influence the seasonality of  
60 atmospheric concentrations and deposition of NH<sub>3</sub>. ~~Due to its high reactivity, a significant fraction of the NH<sub>3</sub> emitted is rapidly  
deposited within a 1 km radius of the source (Fowler et al., 1998). It is clear that the seasonal distributions of NH<sub>3</sub> vary  
depending on the dominant source type and remains a very important element in understanding local emission sources and  
changing in environmental conditions (Tang et al., 2018b).~~

Mis en forme : Indice

Mis en forme : Indice

Mis en forme : Indice

Soil emissions of NO<sub>x</sub> over north equatorial Africa (2.2 TgN/year) account for almost 70% of African soil emissions, because  
65 of the vast areas covered by dry ecosystems (Jaeglé et al., 2004). In the Sahel region, NH<sub>3</sub> emissions can represent an important  
N flux in natural ecosystems, cropland, grazed soils (Hickman et al., 2018) and bacterial decomposition of urea in animal

Mis en forme : Indice

70 excreta (Adon et al., 2010). Indeed, many organisms in soils involved in the decomposition of organic matter excrete  $\text{NH}_3$  directly or N compounds that readily hydrolyze to  $\text{NH}_x$  (Bouwman et al., 1997). A minimum level of soil moisture is required for the microbial activities, such as urea hydrolysis, that generates  $\text{NH}_3$  (Warner et al., 2017). Atmospheric  $\text{NH}_3$  has been reported to be influenced by meteorological and physical parameters such as the presence of plants. Due to high temperatures, low soil moisture and bare soil surfaces conditions, the process of volatilization from soils remains the dominant  $\text{NH}_3$  loss in the West African Sahel region (Delon et al., 2010) and Africa contributes to 14% of the global source of  $\text{NH}_3$  (Bouwman et al., 1997). Likewise,  $\text{NH}_3$  volatilization potential from soil/vegetation systems nearly doubles with every 5 °C increase in air temperature (Sutton et al., 2013; Pinder et al., 2012). However, the capture of  $\text{NH}_3$  at the external surface of the leaf and transport into the leaf interior can be an important sink of atmospheric  $\text{NH}_3$  (Van Hove et al., 1987).

75 According to Giglio et al. (2010), ~250 Mha of land area was burned in the Northern Hemisphere and Southern Hemisphere Africa for the time period 1997 through 2008. This value represents on average 70% of the global area burned each year. Biomass burning emits large amounts of aerosols and trace gases which significantly affect biosphere-atmosphere interface, atmospheric chemistry, cloud properties, Earth radiation budget, global carbon cycle, ecosystem and biodiversity, air quality and atmospheric circulation (Crutzen and Andreae, 1990; Andreae and Merlet, 2001; Stocker et al., 2013). The best guess estimate of  $\text{NH}_3$  emissions from global biomass burning is 6.7 Tg yr<sup>-1</sup> or 11.8% (Levine, 1996). Many scientific papers have shown that biomass burning represents the major source of  $\text{NH}_3$  occurring in African savanna and forest ecosystems (Shi et al., 2015; van der Werf et al., 2017). The amount of  $\text{NH}_3$  emitted from biomass burning in Africa represents roughly 60% to 70% of global  $\text{NH}_3$  emissions biomass fires (Whitburn et al., 2015a). Biomass burning emissions tend to drive seasonal variation in  $\text{NH}_3$  total column densities in West Africa, with the largest emissions occurring late in the dry season and early rainy season. Relationships between biomass burning and  $\text{NH}_3$  may be observed when evaluating national scale statistics: countries with the highest rates of increasing Vertical Column Densities (VCDs) of  $\text{NH}_3$  also had high rates of growth in CO VCDs; burned area displayed a similar pattern, though not significantly (Hickman et al., 2021).

90 Satellite measurements of  $\text{NH}_3$  provide a means to monitor atmospheric composition globally (Clarisse et al., 2009; Warner et al., 2017) and is a powerful tool for understanding atmospheric composition particularly for regions like Africa, where other types of measurements are scarce (Hickman et al., 2018). The Infrared Atmospheric Sounding Interferometer (IASI) datasets/products have been validated based on aircraft and ground-based measurements. The IASI version 3  $\text{NH}_3$  measurements are accurate at the scale of an individual pixel size of 12 km in diameter dataset compare well with the reconstructed in-situ columns, with the reanalysed dataset used in this study presenting a better agreement (Guo et al., 2021). Previous validation work comparing older versions of the IASI product with ground-based Fourier transform infrared (FTIR) observations of  $\text{NH}_3$  total columns has also shown robust correlations at sites with high  $\text{NH}_3$  concentrations, but lower at sites where atmospheric concentrations approach IASI's detection limits (Dammers et al., 2017). Although FTIR observations are absent from Africa, earlier works have shown fair agreement between previous versions of IASI total column densities and INDAAF  $\text{NH}_3$  surface observations in West Africa (Van Damme et al., 2015) and seasonal pattern (Hickman et al., 2018; Ossonhou et al., 2019). During the year 2008, Hickman et al. (2018) found elevated total columns of  $\text{NH}_3$  from the **Infrared**

Mis en forme : Indice

Mis en forme : Exposant

Mis en forme : Indice

Atmospheric Sounding Interferometer (IASI) in the Sahel during March-April mainly due to the Birch effect. Through recent improvements in retrieval algorithms, Van Damme et al. (2021) used the version 3 of the IASI-NH<sub>3</sub> total columns dataset to characterize the evolution of atmospheric NH<sub>3</sub> at global, national and regional scales over the 11-year period (2008-2018). Using a statistical trend method based on least squares regression and bootstrap resampling, (Van Damme et al., 2021) found large increases of NH<sub>3</sub> in several subcontinental regions over the last decade, especially in western and central Africa (29.0 ± 2.3 % .decade<sup>-1</sup>).

Based on a 10-year period of ground-based measurements within the framework of the International Network to Study Deposition and Atmospheric Chemistry in Africa (INDAAF) programnetwork, Adon et al. (2010) documented surface concentrations and seasonal cycles according to the atmospheric sources of NH<sub>3</sub> in West and Central Africa. INDAAF has been a long-term monitoring measurement network since 1995 to document atmospheric chemistry and deposition fluxes in Africa. This program is part of the European Aerosol, Clouds and Trace Gases Research Infrastructure-France (ACTRIS-FR) and of the International Global Atmospheric Chemistry / Deposition of Biogeochemically Important Trace Species (IGAC/DEBITS) activity. In addition, it is a labeled contributing network to the Global Atmospheric Watch/ World Meteorological OrganizationProgram (GAW/WMO) program. INDAAF measurements are of great interest to remove some uncertainties in order to understand the seasonality of several trace gases including NH<sub>3</sub> in Western and Central Africa. Some uncertainties are caused by the scarcity of data on the spatial and temporal distribution of application of synthetic fertilizers and animal manure by crop, and the prevailing management conditions (Beusen et al., 2008).

Here we provide updated analyses of these long-term records, complemented with satellite retrievals, to better understand 21<sup>st</sup> century NH<sub>3</sub> dynamics in Africa.

Specifically, in the framework of the INDAAF program, this study aims to improve long-term NH<sub>3</sub> assessment in the Western and Central Africa region. We first compare the monthly and seasonal patterns in ground-based NH<sub>3</sub> concentrations (1998/2005-2018) and IASI NH<sub>3</sub> total columns (2008-2018) measured at three major African ecosystems: dry savannas, wet savannas and forests. Monthly and seasonal evolutions allow us to highlight the main sources and factors influencing atmospheric NH<sub>3</sub> levels in the tropical African ecosystems. Secondly, we use non-parametric statistically robust tests to assess long-term trends of NH<sub>3</sub> from surface and satellite measurements over the ecosystemic transect, and discuss results according to the analysis of sources seasonality and meteorological data trends.

## 2 Material and methods

### 2.1 Presentation of sampling sites

Figure 1 shows the location of the 8 labeled INDAAF monitoring stations situated in West and Central Africa. Each site represents an African regional ecosystem with its own characteristics in terms of emission sources and its sensitivity to climatic, ecological, and anthropogenic changes. Thus, the sites are distributed by pairs according to latitudinal bands with significant

Mis en forme : Indice

different rainfall patterns to represent dry savanna (Banizoumbou in Niger, Katibougou in Mali), wet savanna (Djouougou in Benin, Lamto in Côte d'Ivoire) and equatorial forest (Bomassa in Republic of Congo, Zoétélé in Cameroon) ecosystems.

135 Additional details on the monitoring sites can be found in the literature (Abbadie, 2006; Adon et al., 2010; Akpo et al., 2015; Delmas et al., 1995; Diawara et al., 2014; Le Roux et al., 2006; Osohou et al., 2019; Ouafou-Leumbe et al., 2018; Yoboué et al., 2005). To date, measurements of atmospheric and meteorological physico-chemical parameters are continuing at all the INDAAF sites. These measurements are referenced in the INDAAF database (<http://indaaf.obs-mip.fr>) and in the WMO OSCAR database (<https://oscar.wmo.int/surface/#/>).

140

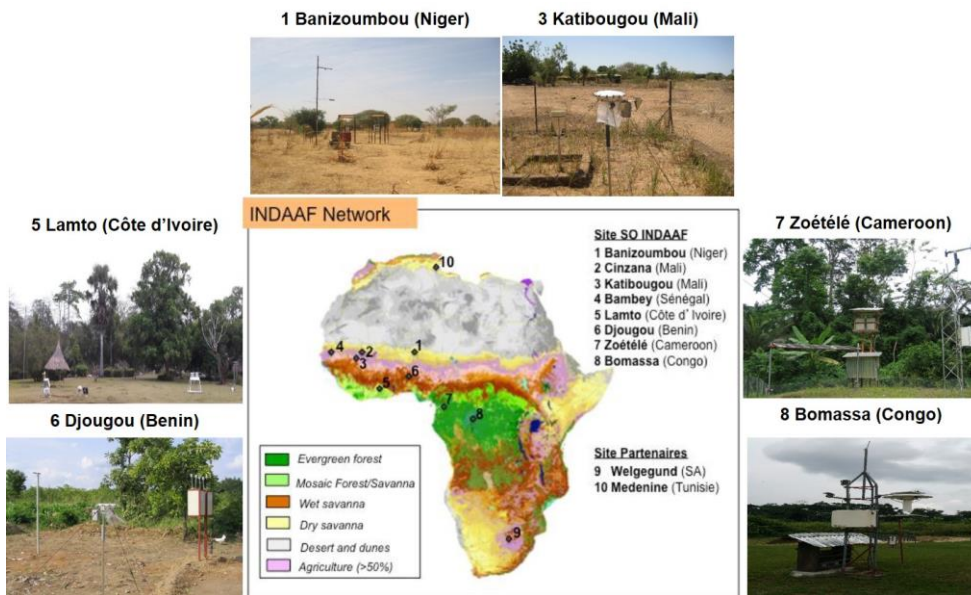

**Figure 1.** INDAAF measurement network composed by 10 stations across Africa. Presentation of the stations of (1) Banizoumbou (Niger), (3) Katibougou (Mali), (5) Lamto (Côte d'Ivoire), (6) Djougou (Benin), (7) Zoétélé (Cameroon) and (8) Bomassa (Republic of Congo) stations (Adapted from Mayaux et al. (2004); Osohou et al. (2019)).

145 The geographical characteristics, soil, vegetation, climate types and the months representative of the wet and dry seasons of the western and Central African sites of interest are described in Table 1. It is important to keep in mind that dry savannas are characterized by a short wet season from June to September, whereas the wet season is longer in wet savanna and forest ecosystems extending from April to October and March to November, respectively.

150 **Table 1.** Site coordinates and location information (WS: wet season; DS: dry season). Dry savannas (WS: June–September DS: October–May), wet savannas (WS: April–October DS: November–March), forest (WS: March–November DS: December–February).

| Ecosystems   | Station                                                                         | Latitude,<br>Longitude | Type of soil and/or<br>vegetation                                         | Climate             | Country              |
|--------------|---------------------------------------------------------------------------------|------------------------|---------------------------------------------------------------------------|---------------------|----------------------|
| Dry savannas | Banizoumbou<br>(Adon et al., 2013; Delon et al., 2012; de Rouw and Rajot, 2004) | 13°31' N,<br>02°38' E  | 91.2% Sandy soils,<br>Tiger bush – fallow bush                            | Sahelian            | Niger                |
|              | Katibougou<br>(Adon et al., 2013; Delon et al., 2012)                           | 12°56' N,<br>07°32' W  | Sandy soils,<br>Deciduous shrubs                                          | Sudano-<br>Sahelian | Mali                 |
| Wet savannas | Djougou<br>(Akpo et al., 2015; Ouafou-<br>Leumbe et al., 2018)                  | 09°39' N,<br>01°44' E  | Ferralitic and ferruginous<br>soil, Mosaic of dry forests<br>and savannah | Sudano-<br>Guinean  | Benin                |
|              | Lamto<br>(Abbadie, 2006; Yoboué<br>et al., 2005)                                | 06°13' N,<br>05°02' W  | Ferruginous soils,<br>Grass, shrub and tree<br>stratum                    | Guinean             | Côte<br>d'Ivoire     |
| Forests      | Bomassa<br>(Mitani et al., 1993)                                                | 02°12' N,<br>16°20' E  | Dense evergreen forest                                                    | Equatorial          | Republic of<br>Congo |
|              | Zoétélé<br>(Sigha et al., 2003)                                                 | 03°15' N,<br>11°53' E  | Dense evergreen forest                                                    | Equatorial          | Cameroon             |

## 2.2 NH<sub>3</sub> sampling and chemical analysis

Monitoring of NH<sub>3</sub> in the framework of the INDAAF program began in 1998 (2005 for Djougou). Sampling was carried out using the INDAAF passive sampler technique inspired by the work of (Fermi, 1991). The passive samplers were mounted and analyzed at the “Laboratoire d’Aérogologie (LAERO)” in Toulouse (France) for all INDAAF sites.

Adon et al. (2010) give a complete overview of the sampling and analytical procedures for the INDAAF passive sampler technique. For each INDAAF site, the passive samplers were made of impregnated filter paper with a species-specific solution for adsorption of gases. Samplers are exposed during one month in duplicates to ensure reproducibility and monthly

160 concentrations are calculated from the arithmetic mean of the duplicates. Desorbed filters are analyzed using ion chromatography (IC). The Laboratoire d'Aérodologie participates twice a year in WMO's quality assurance intercomparison program. Results have always shown that the analytical accuracy of the IC realized at the LAERO is greater than 95%. The intercomparison results of the LAERO are available under the reference 700106 on the WMO website (<http://qasac-americas.org/>). The sampling technique using the INDAAF passive sampler method has been validated on tropical, subtropical, 165 rural and urban sites in Africa (Adon et al., 2010; Bahino et al., 2018; Osohou et al., 2020). INDAAF passive samplers have proven to be accurate, cheaper, easy to use and useful for air quality monitoring.

The precision of the measurements accuracy of passive samplers, evaluated through covariance with duplicates, was estimated at 14.3% for NH<sub>3</sub> (Adon et al., 2010). Detection limit for NH<sub>3</sub> was calculated from field blanks and is equal to 0.7±0.2 ppb. Values below the detection limit, as well as non-valid reproducibility values, were removed from the database. Thus, 170 the percentages of valid data in the final database for the studied period 1998/2005-2018 were 97% for Banizoumbou, 93% for Katibougou, 90% for Djougou, 94% for Lamto, 73% for Bomassa and 93% for Zoétélé.

### 2.3 Biomass burning and anthropogenic emissions of NH<sub>3</sub>

The fourth version of the Global Fire Emissions Database (GFED4) provides monthly biomass burning emissions at 0.25° 175 resolution since 1997 from all biomass burning sources, i.e. many sectors (agricultural waste burning, boreal forest fires, peat fires, savanna fires, grassland fires, shrubland fires, temperate forest fires and tropical deforestation and degradation). Emissions of NH<sub>3</sub> from biomass burning sources were downloaded for the 1° x 1° grid cell containing centered on each INDAAF site. The GFED4 emissions are based on the combination of satellite information on fire activity and vegetation productivity to estimate gridded monthly burned area and fire emissions, as well as scalars that can be used to calculate higher 180 temporal resolution emissions (Giglio et al., 2013; van der Werf et al., 2017). The Global Fire Emissions Database—currently by far the most widely used global fire emissions inventory—has been widely cited in the literature, and GFED4 data can be downloaded from the Emissions of atmospheric Compounds and Compilation of Ancillary Data (ECCAD) database (<https://eccad3.sedoo.fr/>).

The Community Emissions Data System (CEDS) produces consistent estimates of global air emissions species from anthropogenic sources (Smith et al., 2015; O'Rourke et al., 2021). The goal of the CEDS system is to combine existing emissions estimates with driver data to be able of producing consistent estimates of emissions over time at 0.1° x 0.1°. Here, we use CEDS anthropogenic emissions of NH<sub>3</sub> by all the sectors (Energy, transportation, ships, residential, industry process, solvents, agriculture and waste) at 1° x 1° grid cell containing each INDAAF site to estimate the anthropogenic NH<sub>3</sub> emissions. Several studies have described NH<sub>3</sub> emissions data from CEDS (Hoesly et al., 2018; Feng et al., 2019; Beale et al., 2022). 185

Mis en forme : Indice

190

#### 2.4 IASI NH<sub>3</sub> total columns and TRMM measurements

IASI-A, launched aboard the European Space Agency's Metop-A in 2006, provides measurements of atmospheric NH<sub>3</sub> twice a day (9:30 in the morning and evening, Local Solar Time at the equator) (Clarisse et al., 2009). Here we use morning observations, when the thermal contrast is more favorable for infrared retrievals in the lowest layers of the atmosphere (Clarisse et al., 2010; Van Damme et al., 2014). The NH<sub>3</sub> retrieval product used (ANNI-NH<sub>3</sub>-v3R) follows a neural network retrieval approach. We refer to Whitburn et al. (2016) and Van Damme et al. (2017, 2021) for a detailed description of the algorithm. Only observations with cloud cover below 10% were used. Given the absence of hourly or even daily observations of NH<sub>3</sub> concentrations in sub-Saharan Africa, the detection limit of IASI is difficult to determine with certainty. We used the Level-2 IASI-A NH<sub>3</sub> product observations within 100 km around each site for the years 2008—the first full year of data available—to the end of 2018. We regridded the Level 2 IASI NH<sub>3</sub> product to 0.25° × 0.25° resolution. The IASI products have been validated based on aircraft and ground-based measurements. The IASI version 3 dataset compare well with the reconstructed in-situ columns, with the reanalysed dataset used in this study presenting a better agreement (Guo et al., 2021). Previous validation work comparing older versions of the IASI product with ground-based Fourier transform infrared (FTIR) observations of NH<sub>3</sub> total columns has also shown robust correlations at sites with high NH<sub>3</sub> concentrations, but lower at sites where atmospheric concentrations approach IASI's detection limits (Dammers et al., 2017). Although FTIR observations are absent from Africa, earlier works have shown fair agreement between previous versions of IASI total column densities and INDAAF NH<sub>3</sub> surface observations in West Africa (Van Damme et al., 2015) and seasonal pattern (Hickman et al., 2018; Osohou et al., 2019). In the study, the IASI NH<sub>3</sub> reanalysed product was used for the years 2008—the first full year of data available—to the end of 2018.

We also used the Tropical Rainfall Measuring Mission (TRMM) daily precipitation product (3B42), which is based on a combination of TRMM observations, geo-synchronous infrared observations, and rain gauge observations (Huffman et al., 2007). Independent rain gauge observations from West Africa have been used to validate this precipitation product, with no indication of bias (Nicholson et al., 2003).

For analyses of seasonal and interannual variability in each product, we used the mean monthly value (~~for NO<sub>2</sub> and NH<sub>3</sub>~~) or the monthly sum (for precipitation) for a 1° × 1° grid cell containing each INDAAF site. Note that monthly means are excluded from the IASI NH<sub>3</sub> analysis for months when there are fewer than 20 valid observations per month.

#### 2.5 Trend analysis

Trend analyses were carried out by using Mann-Kendall (MK) (Kendall, 1975; Mann, 1945) and Seasonal Kendall (SK) (Hirsch et al., 1982) which are statistical non-parametric tests used to determine the increasing or decreasing trends of a random variable over some period of time. The MK and SK tests were suitable for cases with monotonic trends. The MK test allows working with no seasonal or other cycles in the data such as average annual data. The SK test follows the same principle as



the MK test and is significantly robust to seasonality and was therefore applied for monthly time series. The SK test takes into account a 12-month seasonality in the time series data by computing the MK test on each dataset of “months” over the period 1998/2005-2018 separately, and then combining the results (Tang et al., 2018a). MK and SK tests allow working with non-normal data, in situations with many missing values, and are resistant to outliers (Kumar et al., 2018).

We coupled MK and SK tests respectively to Sen’s Slope (SS) (Sen, 1968) and Seasonal Kendall Slope (SKS) to estimate the magnitude of the trend. These statistical tests have been widely applied and described in the literature to estimate trend in environmental parameters (Shadmani et al., 2012; Yue et al., 2002; Yue and Wang, 2004), while the application over African rural sites is limited (Ossohou et al., 2019, 2020). Two-tailed tests are conducted with the statistical software R version 4.0.4 (R Core Team, 2021) and (Addinsoft, 2022) for this study.

### 3 Results and Discussion

#### 3.1 Variations of ground-based NH<sub>3</sub> and IASI NH<sub>3</sub>

In the first part of this subsection, we will present the NH<sub>3</sub> concentration variations in the dry savanna ecosystem. In the second part, we will present the same variations for wet savanna and forest sites. Each part will show the monthly, annual evolutions and descriptive statistics of NH<sub>3</sub> ground-based and satellite measurements at each site. At the end of each of these two parts, we will discuss the results obtained according to the sources and the major processes that influence the atmospheric NH<sub>3</sub> levels.

##### 3.1.1 Dry savanna

Figure 2 presents monthly variations of ground-based NH<sub>3</sub> concentrations and IASI NH<sub>3</sub> at the INDAAF dry savanna sites of Banizoumbou (Figure 2a) and Katibougou (Figure 2b) over 1998-2018 and 2008-2018, respectively. The monthly 21-year surface concentrations of NH<sub>3</sub> are in the same range at Banizoumbou and Katibougou (Table 2) with coefficients of variation of ~50%. Nevertheless, the monthly coefficient of variation of IASI NH<sub>3</sub> total columns appear to be larger at Banizoumbou (527%) compared to Katibougou (436%) over the 11-year period. We-From 2008 to 2018, we obtain a significant Pearson’s correlation between monthly ground-based NH<sub>3</sub> concentrations and IASI NH<sub>3</sub> total columns at Banizoumbou ( $r=0.30$ ,  $p<0.0104$ ), but not at Katibougou ( $r=0.065$ ,  $p=0.512$ ).

Table 2 shows that mean ground-based concentrations of NH<sub>3</sub> for each dry savanna site are significantly higher in wet season compared to dry season according to the t-test ( $p\leq 0.0103$ ). Furthermore, we observe a decrease of 8.1% (in Banizoumbou) and 23.0% (in Katibougou) in average annual ground-based concentrations of NH<sub>3</sub> from the period 1998-2007 to 2008-2018 (Table 3). In contrast, Table 3 shows that average wet season ground-based NH<sub>3</sub> concentrations increase between 1998-2007 and 2008-2018 in Banizoumbou (+5.9%), but decrease in Katibougou (-22.0%). Mean dry season NH<sub>3</sub> ground-based concentrations decrease in Banizoumbou (-18.9) and Katibougou (-22.0) from 1998-2007 to 2008-2018 (Table 3).

Mis en forme : Indice

Mis en forme : Indice

Mis en forme : Indice

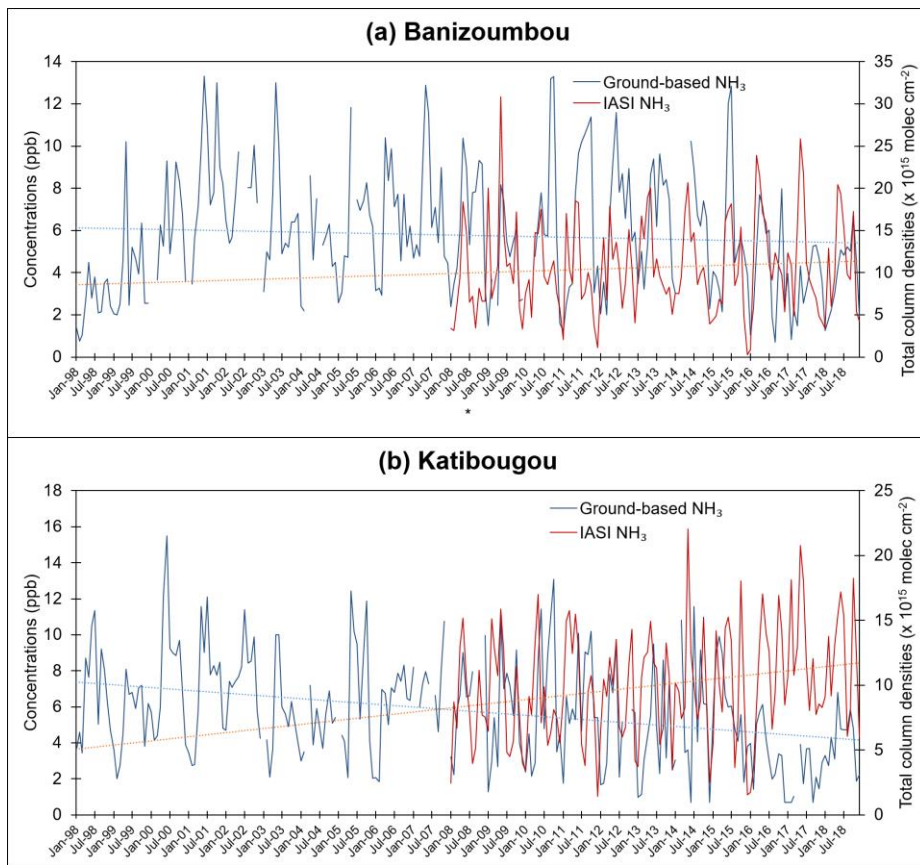

255 **Figure 2.** Monthly time-series of ground-based NH<sub>3</sub> concentrations over the period 1998–2018, and IASI NH<sub>3</sub> total column densities from 2008 to 2018 at (a) Banizoumbou, Niger and (b) Katibougou, Mali. The dashed lines represent the linear regression lines.

**Table 2.** Minimum (Min), maximum (Max) and average (Avg) monthly, annual and seasonal INDAAF NH<sub>3</sub> ground-based, ground-based NH<sub>3</sub> concentrations (1998–2018), and IASI NH<sub>3</sub> total column densities (2008–2018) at Banizoumbou, Niger and Katibougou, Mali

|  |  | Ground-based NH <sub>3</sub><br>(ppb) | IASI NH <sub>3</sub><br>(10 <sup>15</sup> molec cm <sup>-2</sup> ) |
|--|--|---------------------------------------|--------------------------------------------------------------------|
|  |  |                                       |                                                                    |

|            |     | <b>Banizoumbou</b> | <b>Katibougou</b> | <b>Banizoumbou</b> | <b>Katibougou</b> |
|------------|-----|--------------------|-------------------|--------------------|-------------------|
| Monthly    | Min | 0.7                | 0.7               | 0.35               | 1.40.7            |
|            | Max | 13.3               | 13.1              | 30.827.0           | 22.124.0          |
| Annual     | Avg | 5.8±1.2            | 5.7±1.1           | 10.7±1.144.0±1.0   | 10.0±0.940.1±1.2  |
| Wet Season | Min | 2.7                | 2.4               | 8.09.6             | 6.86.2            |
|            | Max | 10.4               | 9.3               | 13.544.4           | 12.442.8          |
|            | Avg | 6.9±1.6            | 6.7±1.5           | 11.3±1.341.7±1.2   | 9.1±1.69.8±1.9    |
| Dry Season | Min | 2.5                | 1.8               | 7.47.4             | 9.08.8            |
|            | Max | 8.1                | 8.0               | 12.944.9           | 12.2              |
|            | Avg | 5.2±1.1            | 5.2±1.0           | 10.3±1.540.7±1.8   | 10.3±0.840.3±0.8  |

260 **Table 3.** Minimum (Min), maximum (Max) and average (Avg) monthly, annual and seasonal ground-based NH<sub>3</sub> concentrations in ppb (1998-2007 & 2008-2018) at Banizoumbou, Niger and Katibougou, Mali

|                   |            | <u>1998-2007</u>   |                   | <u>2008-2018</u>   |                   |
|-------------------|------------|--------------------|-------------------|--------------------|-------------------|
|                   |            | <u>Banizoumbou</u> | <u>Katibougou</u> | <u>Banizoumbou</u> | <u>Katibougou</u> |
| <u>Monthly</u>    | <u>Min</u> | <u>0.8</u>         | <u>1.8</u>        | <u>0.7</u>         | <u>0.7</u>        |
|                   | <u>Max</u> | <u>13.3</u>        | <u>13.1</u>       | <u>13.3</u>        | <u>13.1</u>       |
| <u>Annual</u>     | <u>Avg</u> | <u>6.1±1.3</u>     | <u>6.5±0.8</u>    | <u>5.6±1.1</u>     | <u>5.0±1.1</u>    |
| <u>Wet Season</u> | <u>Min</u> | <u>2.7</u>         | <u>5.0</u>        | <u>3.6</u>         | <u>2.4</u>        |
|                   | <u>Max</u> | <u>9.8</u>         | <u>9.3</u>        | <u>10.4</u>        | <u>9.0</u>        |
|                   | <u>Avg</u> | <u>6.7±1.5</u>     | <u>7.7±1.3</u>    | <u>7.1±1.8</u>     | <u>5.9±1.5</u>    |
| <u>Dry Season</u> | <u>Min</u> | <u>2.5</u>         | <u>4.8</u>        | <u>3.2</u>         | <u>1.8</u>        |

Mis en forme : Police :Gras

Mis en forme : Soulignement

Mis en forme : Indice

|  |     |         |         |         |         |
|--|-----|---------|---------|---------|---------|
|  | Max | 8.1     | 8.0     | 6.0     | 6.4     |
|  | Avg | 5.8±1.2 | 5.9±0.7 | 4.7±0.8 | 4.6±1.0 |

Figure 3 compiles the mean monthly 21-year average ground-based concentrations (gray linesolid lines) and 11-year average total column densities (dark linedashed lines) in dry savanna ecosystems to obtain the mean annual cycle evolutions of NH<sub>3</sub> at the stations of Banizoumbou (a) and Katibougou (b). In both sites of the sub Saharan dry ecosystems, we observe a marked seasonal cycle with two peaks in ground-based concentrations and total columns of NH<sub>3</sub> appearing at the beginning (May-June) and the end (October) of the wet season (Figure 3). The lowest values of NH<sub>3</sub> (concentrations and densities) are generally observed during December-January, but the highest values are obtained in May-June and August. Indeed, mean monthly measurements vary at Banizoumbou from 2.8±1.1 ppb (January) to 8.3±2.6 ppb (June) for ground-based concentrations, and from 4.0±1.33-8±1.5 x 10<sup>15</sup> molec cm<sup>-2</sup> (January) to 19.5±3.720-6±5.6 x 10<sup>15</sup> molec cm<sup>-2</sup> (May) for IASI NH<sub>3</sub> total columns (Figure 3a). At Katibougou, mean monthly ground-based concentrations ranged from 3.3±1.3 ppb (January) to 7.6±2.1 ppb (June), and from 4.8±2.14-4±2.0 x 10<sup>15</sup> molec cm<sup>-2</sup> (December) to 16.2±2.216-1±2.7 x 10<sup>15</sup> molec cm<sup>-2</sup> (May) for IASI NH<sub>3</sub> total columns (Figure 3b). The mean annual variation coefficients are 34% and 27% for ground-based concentrations, 40% and 34% for IASI NH<sub>3</sub> total column measurements at Banizoumbou and Katibougou, respectively.

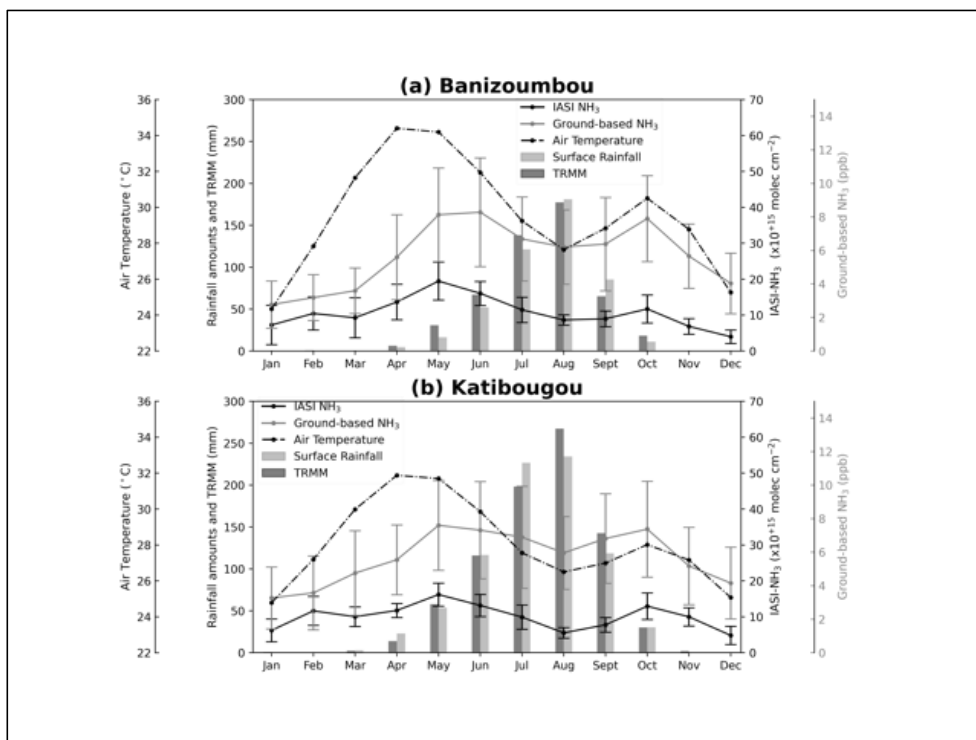

**Figure 3.** Mean monthly ground-based NH<sub>3</sub> concentrations (1998–2018), IASI NH<sub>3</sub> total column densities (2008–2018), rainfall amounts, air temperatures (1998–2018) measured by ground-based instruments (1998–2018) and TRMM (2005–2018) and emissions of NH<sub>3</sub> from GFED4 database (1998–2018) at (a) Banizoumbou, Niger and (b) Katibougou, Mali. Error bars represent the mean absolute deviation.

280

In the Sahelian region, major sources of atmospheric NH<sub>3</sub> include bacterial decomposition of urea in livestock excreta and emission from natural or fertilized soils (Bouwman and Van Der Hoek, 1997). In addition, it has been shown in the literature that African dry savanna ecosystems, characterized by sandy soils, tiger bush, fallow bush and deciduous shrubs (Ossouhou et al., 2019), tend to have alkaline soils, creating favorable conditions to NH<sub>3</sub> volatilization (Clarisse et al., 2019; Delon et al., 2017; Hickman et al., 2018; Vågen et al., 2016). Among other factors, air temperature, rainfall pattern and amount influence NH<sub>3</sub> emissions considerably in drylands like Banizoumbou and Katibougou. The seasonal distributions of NH<sub>3</sub> concentrations look like when the weather is its most warm and dry, NH<sub>3</sub> concentrations are lowest meaning that during the dry season, there's not much biological activity in soils, and so NH<sub>3</sub> emissions are lower than in the rainy season. We find positive correlation

285

290 coefficients statistically significant at 99% between ground-based NH<sub>3</sub> concentrations and air temperature in the dry savanna ecosystem of Banizoumbou (0.32) and Katibougou (0.26) showing that NH<sub>3</sub> volatilization increases with temperature (Van Damme et al., 2020). Note that the correlation coefficient between monthly IASI NH<sub>3</sub> and emission fluxes NH<sub>3</sub> from agricultural sector from CEDS emission inventory at Katibougou is equal to 0.22 ( $p < 0.05$ ).

295 ~~It's also important to highlight the pastoralism in the Sahel region, mainly nomadic in nature. Indeed, Sahelian agro-pastoralism appears to be very important, representing 25 to 30% of the Gross Production Product (GDP), and contributes to 10 to 15% of the GDP of Mali and Niger for example (Adon et al., 2010).~~

In the dry savannas, soils are often characterized by large pulses of NH<sub>3</sub> related to successive dryings and rewettings of dry soils (McCalley and Sparks, 2008; Soper et al., 2016). As we can see in ~~Figure 3~~, the first peak observed in May-June (beginning of the wet season) could be related to the optimal soil moisture to initiate bacterial activity and a flush of newly mineralized N. Our results support the conclusions of an earlier study that used satellite retrievals and in situ measurements for the year 2008 over Africa to argue that the onset of the rainy season causes pulsed emissions of NH<sub>3</sub> over the Sahel (Hickman et al., 2018). Our This study based on ground-based and satellite measurements ranging from one to two decades clearly shows a correspondence between early rainy season precipitation and NH<sub>3</sub> concentrations over the two dry savanna sites. Moreover, the results based on our analysis of a long-term database clearly indicates that this process is reproducible every year.

305 The temporal evolution of NH<sub>3</sub> can be associated with two most important phenomena: (1) Possible Birch effect emissions in the early and possibly late rainy season, and (2) the overall seasonal cycle of NH<sub>3</sub> and the reasons for this broad seasonality (separate from the Birch effect). Indeed, during the wet season (June-September), the months are wetter and cooler and give the soils more moisture than the dry season months. As a result, wet season soils are less susceptible to intense drying events than during the dry season. This consequently results in more limited NH<sub>3</sub> volatilization from soil drying, leading to low NH<sub>3</sub> levels in the wet season. However, at the end of the wet season, rainfall became erratic and led to drying soils for a few days.

310 This erratic rainfall combined with an increase in air temperature may explain the second observed NH<sub>3</sub> peak, occurring at the end of the wet season. A similar late-season pulse of nitric oxide from the re-wetted soils was observed at the regional scales in the Sahel (Jaeglé et al., 2004), suggesting that there may be some similar potential for NH<sub>3</sub> pulsing from re-wetted dry soils. This late-season peak appears to be of less importance than the early wet season peak, presumably because over the growing season, growing vegetation, and microbial communities that immobilized and reduced soils nitrogen pools and may continue to do so. One of the arguments for why Birch effect emissions happen at the beginning of the growing season is that there has been an accumulation of labile N in soils in the dry season. During the wet season, NH<sub>3</sub> is found directly in the rainwater in the form of NH<sub>4</sub><sup>+</sup>, thus promoting wet deposition on the growing vegetation. NH<sub>3</sub> also react with some acid gases such as H<sub>2</sub>SO<sub>4</sub>, HNO<sub>3</sub> and HCl to form aerosols of atmospheric ammonium salts, such as ammonium sulphate ((NH<sub>4</sub>)<sub>2</sub>SO<sub>4</sub>), ammonium bisulphate (NH<sub>4</sub>HSO<sub>4</sub>), ammonium nitrate (NH<sub>4</sub>NO<sub>3</sub>) and ammonium chloride (NH<sub>4</sub>Cl). The conversion of gases to particles in the atmosphere can occur through condensation and/or direct nucleation processes (Baek et al., 2004). Condensation adds mass to pre-existing aerosols, while direct nucleation allows the formation of atmospheric aerosols from

Mis en forme : Indice

Mis en forme : Indice

gaseous precursors. These reactions could therefore lead to a decrease in atmospheric NH<sub>3</sub> concentrations in the Sahelian region (Koziel et al., 2006). As shown by positive correlation between IASI NH<sub>3</sub> and emissions of NH<sub>3</sub> by agricultural activities, we suggest that in the dry savanna area of Katibougou, NH<sub>3</sub> concentration levels could also be influenced by agriculture activities. Since these months of September through March correspond to the fire period in the wet savanna and forest sites, we suggest that even though the two dry savanna sites experience few fires, NH<sub>3</sub> columns from IASI are certainly affected by NH<sub>3</sub> present in the transported fire plumes.

It's also important to highlight the pastoralism in the Sahel region, mainly nomadic in nature. Indeed, Sahelian agro-pastoralism appears to be very important, representing 25 to 30% of the Gross Production Product (GDP), and contributes to 10 to 15% of the GDP of Mali and Niger for example (Adon et al., 2010).

~~We note that the GFED4 inventory shows important NH<sub>3</sub> emissions by all biomass burning sources from September through March in the dry savanna sites (Figure 3). Since these months correspond to the fire period in the wet savanna and forest sites, we suggest that even though the two dry savanna sites experience few fires, NH<sub>3</sub> columns from IASI are certainly affected by NH<sub>3</sub> present in the transported fire plumes.~~

### 3.1.2 Wet savanna and forest

In the wet savanna ecosystem, we present the monthly evolutions of ground-based NH<sub>3</sub> concentrations (2005-2018: Djougou, 1998-2018: Lamto) and IASI NH<sub>3</sub> total column densities (2008-2018 for both sites) at Djougou (Figure 4a) and Lamto (Figure 4b). Monthly ground-based NH<sub>3</sub> concentrations range from 0.7 to 12.1 ppb at Djougou and from 0.7 to 14.28-9 ppb at Lamto. IASI NH<sub>3</sub> total column densities vary from 2.89-7 x 10<sup>15</sup> to 36.6 x 10<sup>15</sup> molec cm<sup>-2</sup> at Djougou and from -1.30-3 x 10<sup>15</sup> to 58.055-6 x 10<sup>15</sup> molec cm<sup>-2</sup> at Lamto. The results show that the maxima of ground-based NH<sub>3</sub> concentrations are generally the most important at Djougou (Figure 4), while those of IASI NH<sub>3</sub> total column densities are highest at Lamto (Figure 4). The coefficients of variation are globally high, equal to 57% and 62% for ground-based measurements, and 54% and 69% for IASI NH<sub>3</sub> total columns at Djougou and Lamto, respectively. For the entire period of measurements, Pearson correlation test applied to monthly ground-based NH<sub>3</sub> concentrations and IASI NH<sub>3</sub> total columns reveals no significant correlation at Djougou ( $r=0.034$ ,  $p=0.7268$ ), but strong linear correlation at Lamto ( $r=0.559$ ,  $p<0.01$ ).

Table 43 presents a synthesis of monthly, seasonal and annual minimum, maximum and average ground-based NH<sub>3</sub> concentrations and IASI NH<sub>3</sub> total columns at Djougou and Lamto stations. The results show that mean annual, wet season and dry season ground-based NH<sub>3</sub> concentrations in Djougou are significantly higher than that in Lamto (t-test,  $p<0.05$ ). In contrast, mean annual and dry season IASI NH<sub>3</sub> total columns are significantly higher more important (t-test,  $p<0.01$ ) at Lamto compared to Djougou (Table 42). The data recorded in Table 5 show that for the period 2006-2007, the average ground-based NH<sub>3</sub> concentrations at Djougou and Lamto are of the same order of magnitude. However, the average concentration obtained in the dry season of the period 2006-2007 in Lamto is 20% higher than in Djougou. In contrast to the period 2006-2007, annual,

Mis en forme : Indice

dry and wet season averages of ground-based concentrations of  $\text{NH}_3$  over the period 2008-2018 are the highest at Djougou, with differences ranging from 1.6 to 1.8 ppb compared to the Lamto averages (Table 5).

Mis en forme : Indice

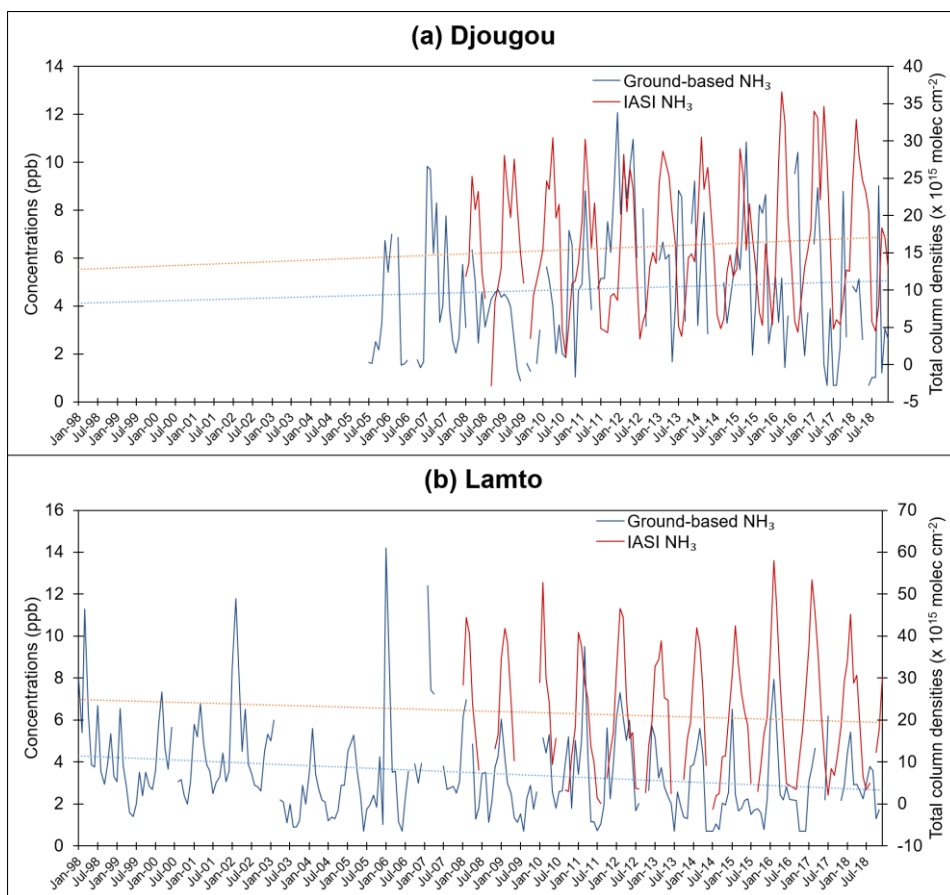

Figure 44. Monthly time-series of ground-based  $\text{NH}_3$  concentrations over the periods 2005-2018 and 1998-2018, and IASI  $\text{NH}_3$  total column densities from 2008 to 2018 at (a) Djougou, Benin and (b) Lamto, Côte d'Ivoire. The dashed lines represent the linear regression lines.

360



**Tableau 34.** Minimum (Min), maximum (Max) and average (Avg) monthly, annual and seasonal INDAAF NH<sub>3</sub> ground-based ground-based NH<sub>3</sub> concentrations (Djougou : 2005-2018; Lamto : 1998–2018), and IASI NH<sub>3</sub> total column densities (2008–2018) at Djougou, Benin and Lamto, Côte d'Ivoire

|            |     | Ground-based NH <sub>3</sub><br>(ppb) |                | IASI NH <sub>3</sub><br>(10 <sup>15</sup> molec cm <sup>-2</sup> ) |                         |
|------------|-----|---------------------------------------|----------------|--------------------------------------------------------------------|-------------------------|
|            |     | Djougou                               | Lamto          | Djougou                                                            | Lamto                   |
| Monthly    | Min | 0.7                                   | 0.7            | <u>-2.80-7</u>                                                     | <u>-1.30-3</u>          |
|            | Max | 12.1                                  | <u>8.514.2</u> | 36.6                                                               | <u>58.055.6</u>         |
| Annual     | Avg | 4.7±1.3                               | 3.5±0.8        | <u>16.0±1.316.5±1.2</u>                                            | <u>20.9±1.621.4±1.0</u> |
| Wet Season | Min | 1.5                                   | 1.5            | <u>10.611.9</u>                                                    | <u>8.410.4</u>          |
|            | Max | 7.6                                   | 4.5            | <u>15.016.3</u>                                                    | <u>15.915.5</u>         |
|            | Avg | 4.1±1.5                               | 2.8±0.9        | <u>13.4±0.914.6±1.1</u>                                            | <u>12.0±1.712.5±1.2</u> |
| Dry Season | Min | 3.5                                   | 2.7            | <u>14.913.9</u>                                                    | <u>27.328.5</u>         |
|            | Max | 8.8                                   | 7.8            | <u>23.122.7</u>                                                    | <u>37.137.5</u>         |
|            | Avg | 5.5±1.3                               | 4.6±1.1        | <u>19.6±2.119.2±2.1</u>                                            | <u>30.7±2.731.6±2.1</u> |

**Table 5.** Minimum (Min), maximum (Max) and average (Avg) monthly, annual and seasonal ground-based NH<sub>3</sub> concentrations in ppb (2006-2007 & 2008-2018) at Djougou, Benin and Lamto, Côte d'Ivoire. \*Full year of data in Djougou begins in 2006.

|         |     | 2006-2007*     |                | 2008-2018      |                |
|---------|-----|----------------|----------------|----------------|----------------|
|         |     | Djougou        | Lamto          | Djougou        | Lamto          |
| Monthly | Min | <u>1.4</u>     | <u>0.7</u>     | <u>0.7</u>     | <u>0.7</u>     |
|         | Max | <u>9.8</u>     | <u>14.2</u>    | <u>12.1</u>    | <u>9.5</u>     |
| Annual  | Avg | <u>4.4±1.1</u> | <u>4.7±0.3</u> | <u>4.9±1.3</u> | <u>3.2±0.6</u> |

Mis en forme : Police :Italique

Mis en forme : Exposant

|                   |            |                |                |                |                |
|-------------------|------------|----------------|----------------|----------------|----------------|
| <u>Wet Season</u> | <u>Min</u> | <u>2.7</u>     | <u>3.5</u>     | <u>1.5</u>     | <u>1.5</u>     |
|                   | <u>Max</u> | <u>4.6</u>     | <u>3.9</u>     | <u>7.6</u>     | <u>4.5</u>     |
|                   | <u>Avg</u> | <u>3.6±0.9</u> | <u>3.2±0.7</u> | <u>4.4±1.5</u> | <u>2.6±0.7</u> |
| <u>Dry Season</u> | <u>Min</u> | <u>3.9</u>     | <u>6.4</u>     | <u>3.5</u>     | <u>2.7</u>     |
|                   | <u>Max</u> | <u>6.8</u>     | <u>6.7</u>     | <u>8.8</u>     | <u>5.6</u>     |
|                   | <u>Avg</u> | <u>5.4±1.5</u> | <u>6.5±0.2</u> | <u>5.6±1.4</u> | <u>4.0±0.7</u> |

370

Figure 5 presents the annual mean cycle of monthly ground-based concentrations and IASI NH<sub>3</sub> total column densities at Djougou (Figure: 5a) and Lamto (Figure: 5b) located in the wet savanna ecosystem. The results show that the annual mean ground-based and IASI NH<sub>3</sub> profiles have a poor covariation at Djougou (Figure: 5a), while IASI NH<sub>3</sub> shows a ~~have~~ good agreement ~~well the evolution of with~~ ground-based NH<sub>3</sub> at the Lamto site (Figure: 5b). Ground-based NH<sub>3</sub> concentrations and IASI NH<sub>3</sub> total columns exhibit a ~~clear~~ seasonality at Lamto ~~and Djougou~~ stations with higher values occurring in the dry season (January to ~~February~~March) and lower values in the wet season (May through November). Mean annual cycle of ~~ground-based NH<sub>3</sub> concentrations and~~ IASI NH<sub>3</sub> total column densities seasonality are less marked at Djougou (~~maximum from January to April~~) compared to Lamto station. Monthly mean concentrations and total column densities of NH<sub>3</sub> range from 3.2±1.4 (June) to 6.7±1.8 ppb (February) and from ~~4.7±1.16.6±2.0~~ x 10<sup>15</sup> (August) to 27.3±~~3.94.0~~ x 10<sup>15</sup> molec cm<sup>-2</sup> (February) at Djougou (Figure: 5a), and from 2.2±1.0 (June) to 6.1±1.8 ppb (February) and from ~~2.7±1.65.4±2.6~~ x 10<sup>15</sup> (July) to ~~45.3±5.346.6±5.4~~ x 10<sup>15</sup> molec cm<sup>-2</sup> (February) at Lamto (Figure: 5b), respectively. The mean annual variation coefficients are 23% and 41% for ground-based concentrations, ~~5146%~~ and ~~762%~~ for IASI NH<sub>3</sub> total column measurements at Djougou and Lamto, respectively.

375

380

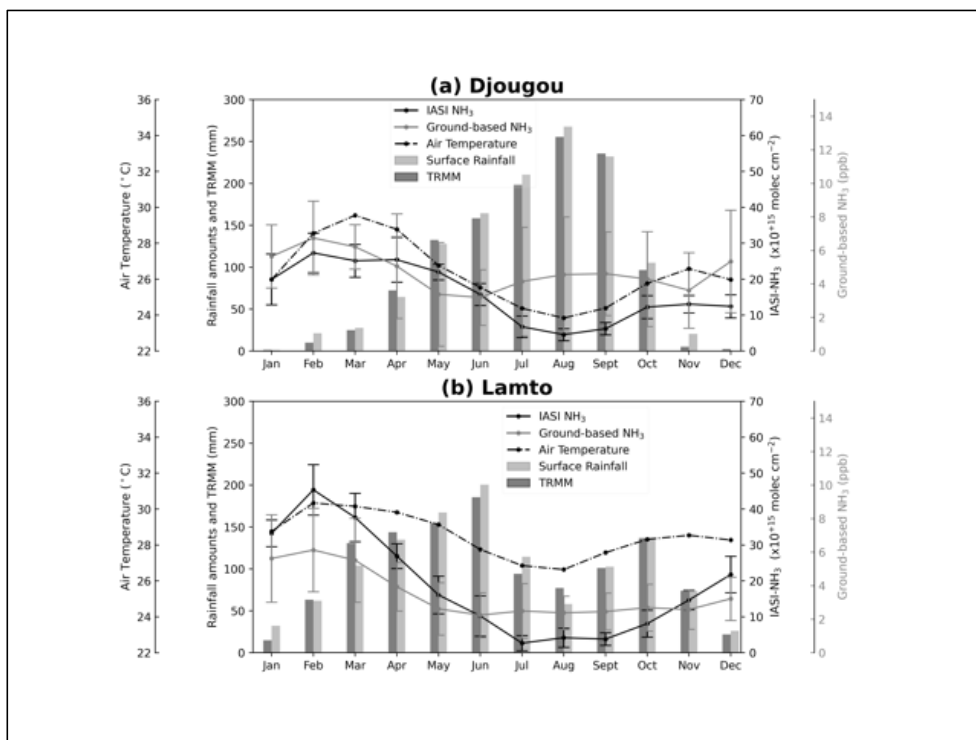

385 **Figure 55.** Mean monthly ground-based NH<sub>3</sub> concentrations (Djougou : 2005-2018 & Lamto : 1998-2018), IASI NH<sub>3</sub> total column densities (2008-2018), rainfall amounts, air temperatures measured by ground-based instruments (1998-2018) and; TRMM (2005-2018) and emissions of NH<sub>3</sub> from GFED4 database (Djougou : 2005-2018 & Lamto : 1998-2018) at (a) Djougou, Benin and (b) Lamto, Côte d'Ivoire. Error bars represent the mean absolute deviation.

390 The monthly variations of ground-based NH<sub>3</sub> concentrations (1998-2018) and IASI NH<sub>3</sub> total column densities (2008-2018) over the two forested monitoring sites are presented in Figures 6. The results show that the peak values of ground-based concentrations and IASI NH<sub>3</sub> total column densities are generally higher-larger at Bomassa (Figure 6a) compared to Zoétélé (Figure 6b). The monthly 21-year coefficients of variation of NH<sub>3</sub> are in the same order of magnitude at Bomassa (55%) and Zoétélé (56%). Nevertheless, the monthly coefficient of variation of IASI NH<sub>3</sub> total column densities are significantly higher-more important in the forested ecosystem compared to dry and wet savannas, i.e more than 80% at Bomassa and Zoétélé

395

over the 11-year period. Significant Pearson's correlations are found between monthly ground-based NH<sub>3</sub> and IASI-NH<sub>3</sub> total column densities at Bomassa ( $r = 0.1823$ ,  $p = 0.073$ ) and Zoétélé ( $r = 0.3436$ ,  $p < 0.001$ ).

The monthly, seasonal and annual measurement results of ground-based NH<sub>3</sub> concentrations and IASI NH<sub>3</sub> total columns at Bomassa and Zoétélé are summarized in Table 46. According to the t-test, ground-based NH<sub>3</sub> average concentrations are significantly higher ( $p < 0.001$ ) at Bomassa compared to Zoétélé, but IASI NH<sub>3</sub> total column average densities are in the same order of magnitude for these sites. For each forested ecosystem station, the results show that the mean ground-based NH<sub>3</sub> concentrations are in the same order of magnitude between wet and dry seasons. However, IASI total column densities are significantly higher ( $t$ -test,  $p < 0.001$ ) in the dry season at Bomassa and Zoétélé compared to the wet season (Table 46). We summarized the descriptive statistics of ground-based NH<sub>3</sub> concentrations in Table 7, separately for the periods 1998-2007 and 2008-2018. In general, we note that mean concentrations have increased for the Bomassa site, but decreased at Zoétélé between 1998-2007 and 2008-2018. Indeed, mean dry season, annual and wet season ground-based NH<sub>3</sub> concentrations in Bomassa have increased by 33, 41, and 44%, respectively, from 1998-2007 to 2008-2018 (Table 7). At Zoétélé, we observe a decrease of about 26% in the mean annual, wet and dry seasons ground-based concentrations of NH<sub>3</sub> between 1998-2007 and 2008-2018 (Table 7).

Mis en forme : Indice

Mis en forme : Indice

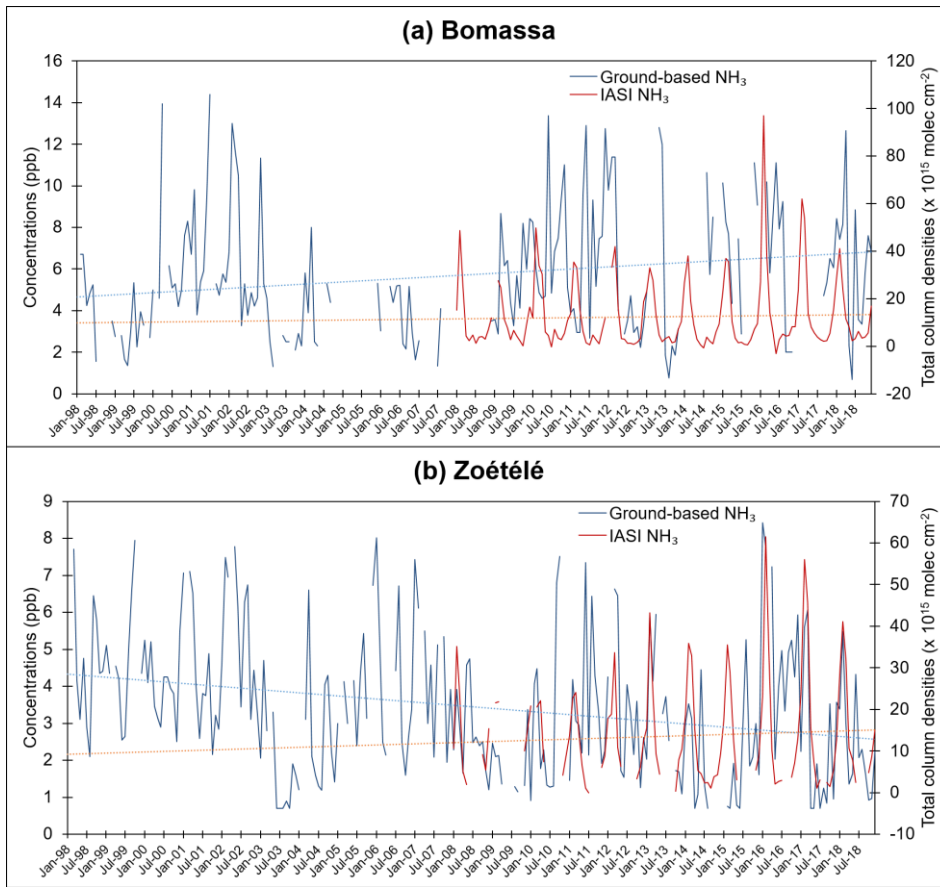

**Figure 66.** Monthly time-series of ground-based NH<sub>3</sub> concentrations over the period 1998–2018, and IASI NH<sub>3</sub> total column densities from 2008 to 2018 at (a) Bomassa, Republic of Congo and (b) Zoétélé, Cameroon. The dashed lines represent the linear regression lines.

**Tableau 46.** Minimum (Min), maximum (Max) and average (Avg) monthly, annual and seasonal INDAAF NH<sub>3</sub> ground-based NH<sub>3</sub> concentrations (1998–2018), and IASI NH<sub>3</sub> total column densities (2008–2018) at Bomassa, Republic of Congo and Zoétélé, Cameroon.

|  |  | <b>Ground-based NH<sub>3</sub></b><br><b>(ppb)</b> | <b>IASI NH<sub>3</sub></b><br><b>(10<sup>15</sup> molec cm<sup>-2</sup>)</b> |
|--|--|----------------------------------------------------|------------------------------------------------------------------------------|
|  |  |                                                    |                                                                              |

|            |     | <b>Bomassa</b> | <b>Zoétélé</b> | <b>Bomassa</b>          | <b>Zoétélé</b>          |
|------------|-----|----------------|----------------|-------------------------|-------------------------|
| Monthly    | Min | 0.7            | 0.7            | <u>-3.10-4</u>          | <u>-0.10-2</u>          |
|            | Max | 14.4           | 8.4            | <u>9789-9</u>           | <u>61.566-1</u>         |
| Annual     | Avg | 5.6±1.4        | 3.4±0.9        | <u>12.4±2.144-3±2-3</u> | <u>13.8±2.045-1±2-8</u> |
| Wet Season | Min | 2.4            | 1.4            | <u>5.05-8</u>           | <u>7.89-3</u>           |
|            | Max | 8.6            | 5.6            | <u>10.943-1</u>         | <u>12.420-0</u>         |
|            | Avg | 5.6±1.5        | 3.3±0.9        | <u>7.9±1.29-4±1-6</u>   | <u>9.9±1.411-2±1-8</u>  |
| Dry Season | Min | 2.3            | 1.2            | <u>20.449-3</u>         | <u>14.89-6</u>          |
|            | Max | 9.1            | 7.4            | <u>44.143-4</u>         | <u>32.534-0</u>         |
|            | Avg | 5.6±1.7        | 3.8±1.3        | <u>26.8±4.827-3±3-9</u> | <u>22.0±4.822-9±5-2</u> |

415

**Table 7.** Minimum (Min), maximum (Max) and average (Avg) monthly, annual and seasonal ground-based NH<sub>3</sub> concentrations in ppb (1998-2007 & 2008-2018) at Bomassa, Republic of Congo and Zoétélé, cameroon

|                   |            | <u>1998-2007</u> |                | <u>2008-2018</u> |                |
|-------------------|------------|------------------|----------------|------------------|----------------|
|                   |            | <u>Bomassa</u>   | <u>Zoétélé</u> | <u>Bomassa</u>   | <u>Zoétélé</u> |
| <u>Monthly</u>    | <u>Min</u> | <u>1.3</u>       | <u>0.7</u>     | <u>0.7</u>       | <u>0.7</u>     |
|                   | <u>Max</u> | <u>14.4</u>      | <u>8.0</u>     | <u>13.6</u>      | <u>8.4</u>     |
| <u>Annual</u>     | <u>Avg</u> | <u>4.6±1.4</u>   | <u>4.0±0.7</u> | <u>6.5±0.9</u>   | <u>2.9±0.7</u> |
| <u>Wet Season</u> | <u>Min</u> | <u>2.4</u>       | <u>1.5</u>     | <u>4.4</u>       | <u>1.4</u>     |
|                   | <u>Max</u> | <u>6.8</u>       | <u>5.6</u>     | <u>6.8</u>       | <u>4.5</u>     |
|                   | <u>Avg</u> | <u>4.5±1.4</u>   | <u>3.8±0.8</u> | <u>6.5±0.9</u>   | <u>2.8±0.8</u> |
| <u>Dry Season</u> | <u>Min</u> | <u>2.3</u>       | <u>1.3</u>     | <u>3.5</u>       | <u>1.2</u>     |

|  |     |         |         |         |         |
|--|-----|---------|---------|---------|---------|
|  | Max | 8.4     | 5.8     | 9.1     | 7.4     |
|  | Avg | 4.8±1.7 | 4.4±1.0 | 6.4±1.4 | 3.3±0.9 |

420 We present the mean annual ground-based NH<sub>3</sub> concentrations and IASI NH<sub>3</sub> evolutions based on monthly data measured in  
the forested ecosystems of Bomassa (Figure 7a) and Zoétélé (Figure 7b). ~~Ground-based NH<sub>3</sub> concentrations are high or low in  
both the dry and wet seasons, with no clear seasonality~~ Ground-based concentrations show no clear seasonality at Bomassa and  
Zoétélé. In contrast, IASI NH<sub>3</sub> total columns shows a well-marked seasonality, with high densities in the dry season (December  
to February), and low densities in the wet season (April~~March~~ to November) for the two sites. Mean monthly ground-based  
425 NH<sub>3</sub> concentrations narrowly vary from a minimum of 4.1±1.1 ppb (September) and a maximum of 7.1±3.0 ppb (March) at  
Bomassa (Figure 7a), from a minimum and maximum of 2.4±0.9 ppb (November) and 4.2±1.6 ppb (March) at Zoétélé,  
respectively (Figure 7b). NH<sub>3</sub> total column densities show a peak representing the annual maximum in February  
(45.7±13.646.5±14.3 x 10<sup>15</sup> molec cm<sup>-2</sup> for Bomassa and 37.1±9.936.4±12.5 x 10<sup>15</sup> molec cm<sup>-2</sup> for Zoétélé) and the lowest  
values in ~~July~~September (2.2±1.72.9±2.0 x 10<sup>15</sup> molec cm<sup>-2</sup> for Bomassa) and ~~July~~(2.1±1.03.7±1.0 x 10<sup>15</sup> molec cm<sup>-2</sup> for  
430 Zoétélé). Mean annual coefficients of variation over the 21-year period are 16% and 19% for NH<sub>3</sub> concentrations, and more  
than 80% for IASI NH<sub>3</sub> over the 11-year period at Bomassa and Zoétélé, respectively.

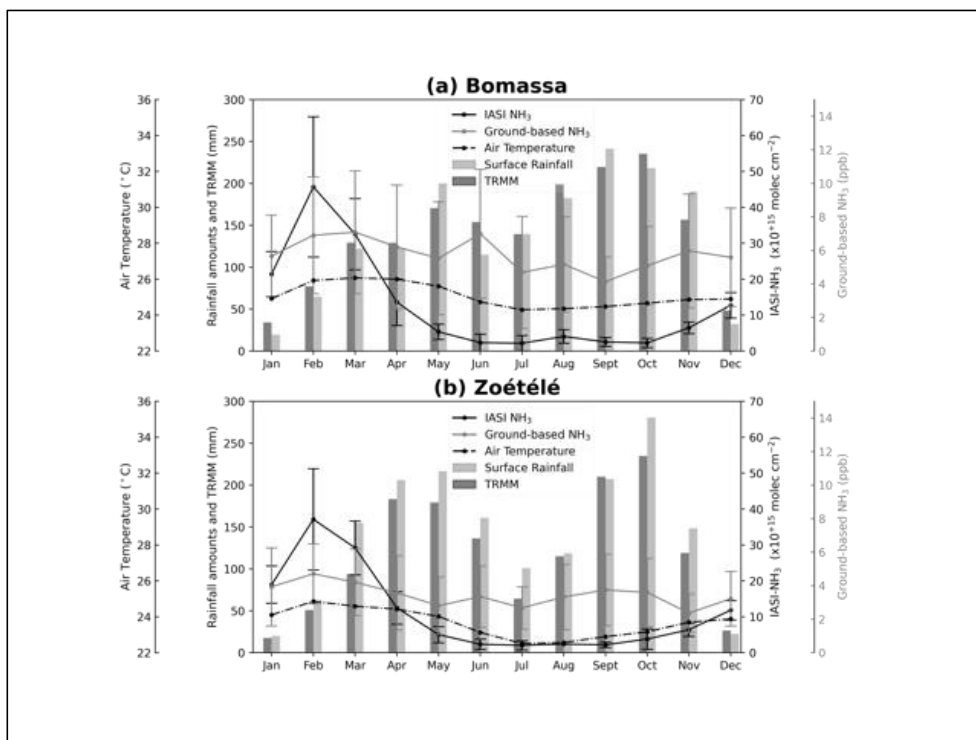

**Figure 7.** Mean monthly ground-based NH<sub>3</sub> concentrations (1998–2018), IASI NH<sub>3</sub> total column densities (2008–2018), rainfall amounts, air temperatures (1998–2018) measured by ground-based instruments (1998–2018) and TRMM (2005–2018) and emissions of NH<sub>3</sub> from GFED4 database (1998–2018) at (a) Bomassa, Republic of Congo and (b) Zoétélé, Cameroon. Error bars represent the mean absolute deviation.

Biomass burning is recognized as a significant source of atmospheric NH<sub>3</sub>, especially in tropical regions, but also at higher latitudes (Coheur et al., 2009; Lutsch et al., 2019; Whitburn et al., 2015b). It represents the second largest terrestrial source of NH<sub>3</sub> after agriculture (Whitburn et al., 2017) and contributes to about 13% of total NH<sub>3</sub> emissions (Galloway et al., 2004) at the global scale. Other major sources of NH<sub>3</sub> in African wet savanna and forest ecosystems include decomposition of urea from animal excreta, fertilized soils (Bouwman et al., 2002b) and domestic fuelwood burning (Adon et al., 2010; Lobert et al., 1990). In wet savannas and forests in Africa, the NH<sub>3</sub> concentrations represent a combination of all natural sources with the largest contribution from biomass burning sources (Adon et al., 2010).



445 Our study demonstrates that highest NH<sub>3</sub> concentrations in wet savanna and forest ecosystems are recorded during the period when fires predominate (December-February), while the lowest are obtained when rainfall is high. Indeed, during the dry season, farmers take advantage of the absence of rainfall to clear land, weed and burn agricultural residues. This slash-and-burn agriculture contributes significantly to nitrogen (NO<sub>x</sub> and NH<sub>3</sub>) and carbon (CO and CO<sub>2</sub>) emissions (Tiemoko et al., 2021) into the atmosphere during the dry season. Fires related to agriculture and hunting become more important in the dry season and represent respectively 64% and 6% of the economic activities of the villagers in certain areas such as Lamto (Suzanne, 2016).

In order to show the influence of the combustion and anthropogenic sources on the atmospheric NH<sub>3</sub> concentrations and total column densities, we have conducted linear correlation study between monthly ground-based NH<sub>3</sub> concentrations and IASI NH<sub>3</sub> total column densities on the one hand, and the GFED4 (1998-2018) and CEDS (1998-2018) emission data of NH<sub>3</sub> ~~from biomass burning~~ (Giglio et al., 2013; van der Werf et al., 2017) on the other hand. For the station of Djougou, correlations are calculated over the periods 2005-2018 and 2008-2018 for ground-based NH<sub>3</sub> and IASI NH<sub>3</sub>, respectively. These combustion sources include agricultural waste burning, forest fires, tropical deforestation and degradation, peat fires, savanna, grassland, shrubland and temperate forest fires. The Pearson correlation results are summarized in Table 8 below.

460 **Table 8.** Pearson correlation coefficients between NH<sub>3</sub> measurements (ground-based and IASI) and emission data (GFED4 and CEDS) at INDAAF wet savanna (Djougou, Benin and Lamto, Côte d'Ivoire) and forest (Bomassa, Republic of Congo and Zoétélé, Cameroon) sites over the period 1998-2018 (Djougou: 2005-2018). Coefficients have been calculated from monthly data. Values in brackets represent significance levels (*p-values*).

|                               | <u>Djougou</u>         | <u>Lamto</u>           | <u>Bomassa</u>         | <u>Zoétélé</u>          |
|-------------------------------|------------------------|------------------------|------------------------|-------------------------|
| <u>Ground-based and GFED4</u> | 0.04 (0.63)            | <b>0.34 (&lt;0.01)</b> | -0.06 (0.39)           | 0.12 (0.07)             |
| <u>Ground-based and CEDS</u>  | <b>0.19 (0.02)</b>     | -0.04 (0.5)            | <b>0.22 (&lt;0.01)</b> | <b>-0.27 (&lt;0.01)</b> |
| <u>IASI and GFED4</u>         | -0.06 (0.5)            | <b>0.33 (&lt;0.01)</b> | <b>0.18 (0.04)</b>     | <b>0.39 (&lt;0.01)</b>  |
| <u>IASI and CEDS</u>          | <b>0.27 (&lt;0.01)</b> | <b>0.37 (&lt;0.01)</b> | <b>0.24 (&lt;0.01)</b> | <b>0.27 (&lt;0.01)</b>  |

465 The results show that there are significant Pearson correlation coefficients between monthly ground-based NH<sub>3</sub> concentrations and NH<sub>3</sub> emissions at Lamto ( $r = 0.33, p < 0.001$ ). Monthly IASI NH<sub>3</sub> total columns are correlated to NH<sub>3</sub> emissions at Lamto ( $r = 0.35, p < 0.001$ ). These results show that NH<sub>3</sub> emissions from biomass burning have an influence on ground-based concentrations and total columns of NH<sub>3</sub> in the Lamto, Bomassa and Zoétélé area (Table 8). Similarly, there is an evident relationship between anthropogenic emissions by residential and agricultural sectors in the wet savanna and forest sites (Table 8). These results are consistent with the study of Whitburn et al. (2015b) carried out in four regions including “Africa north of Equator (ANE)” accounting for a major part of the total affected by fires. Indeed, they found a significant correlation ( $r = 0.57$ ) between time series of monthly NH<sub>3</sub> columns retrieved from IASI measurements and MODIS fire radiative power (FRP)

- Mis en forme : Indice
- Mis en forme : Indice
- Mis en forme : Indice
- Mis en forme : Police :Italique
- Mis en forme : Police :Gras
- Mis en forme : Centré
- Mis en forme : Police :Gras
- Mis en forme : Centré
- Mis en forme : Police :Italique
- Mis en forme : Police :Gras
- Mis en forme : Police :Italique
- Mis en forme : Police :Non Gras
- Mis en forme : Police :Italique
- Mis en forme : Police :Non Gras
- Mis en forme : Police :Italique
- Mis en forme : Police :Gras
- Mis en forme : Centré
- Mis en forme : Police :Italique
- Mis en forme : Police :Italique
- Mis en forme : Police :Italique
- Mis en forme : Police :Gras
- Mis en forme : Centré
- Mis en forme : Police :Italique
- Mis en forme : Police :Italique
- Mis en forme : Police :Italique
- Mis en forme : Police :Gras
- Mis en forme : Centré
- Mis en forme : Police :Italique
- Mis en forme : Police :Italique
- Mis en forme : Indice

over the period 2008-2013 (Whitburn et al., 2015e). The most likely explanation of ~~these significant~~ ~~this~~ correlations between  
475 NH<sub>3</sub> (~~simultaneously for~~ ground-based concentrations and total columns) and emission data (~~GFED and CEDS~~) is that NH<sub>3</sub>  
concentrations observed ~~in this region at Lamto are mainly influenced by biomass burning and agricultural sources are~~  
~~therefore probably the combination of both biomass burning and soil emissions at Djougou and Lamto~~ (Adon et al., 2010,  
2013; Whitburn et al., 2015e). ~~However, atmospheric NH<sub>3</sub> concentrations and columns in Djougou, Bomassa and Zoétéle are~~  
~~also affected by human activities in these areas.~~

Mis en forme : Indice

480 For the wet savanna and forested ecosystems where NH<sub>3</sub> seasonality is driven by biomass burning emissions, it looks like there  
is still an overall pattern of increasing NH<sub>3</sub> in the dry season, and decreasing NH<sub>3</sub> in the rainy season that would be expected,  
which is ~~not the case~~ ~~usual~~ at Djougou. This modest increase in ground-based NH<sub>3</sub> concentrations in the wet season at  
Djougou could be due to the Leaf Area Index (LAI) which is much lower there than in Lamto during the wet season with  
annual averages of about 1.2 m<sup>2</sup> m<sup>-2</sup> in Djougou and 3.6 m<sup>2</sup> m<sup>-2</sup> in Lamto (Ossohou et al., 2019). Indeed, NH<sub>3</sub> emissions during  
485 the wet season at Djougou are therefore less intercepted by the canopy via the dry deposition process. ~~Note that canopy heights~~  
~~at Djougou and Lamto look very different on Figure 1. Dry deposition can be affected by both LAI and the vertical distance~~  
~~between canopy and instrument. The canopy looks much shorter at Djougou, with lots of vegetation being lower than the~~  
~~instrument. This could be another reason why NH<sub>3</sub> emissions may be less intercepted by the canopy at Djougou.~~ In a general  
way, we assume that canopy interception/bi-directional exchange could play a role in reducing the seasonal variability at the  
490 surface (Adon et al., 2013; Delon et al., 2019), but not for the total column densities while keeping in mind that the satellite  
observations are for 100 km<sup>1°x1°</sup> around each site, so they are influenced by a lot of non-local dynamics. ~~It is also important~~  
~~to highlight the influence of air temperature, which significantly enhance NH<sub>3</sub> volatilization at Djougou, Lamto and Bomassa~~  
~~with correlation coefficients (p<0.05). The correlation coefficients will be given in section 3.2 to justify the significant NH<sub>3</sub>~~  
~~trends obtained for these sites.~~

Mis en forme : Indice

Mis en forme : Indice

Mis en forme : Indice

### 495 3.2 Trends of ground-based NH<sub>3</sub> and IASI NH<sub>3</sub>

Mis en forme : Indice

We conduct the long-term trend computations by using Mann-Kendall (MK) test coupled to Sen Slope (SS) for mean annual,  
mean wet and dry seasons for each year of ground-based concentrations (14 and 21-year periods) and total columns densities  
500 ~~within a diameter of 100 km for the 1° x 1° grid cell~~ centered around each site (11-year period). Additional trend analyses are  
carried out using the Seasonal Kendall (SK) coupled to Seasonal Kendall Slope (SKS) only for monthly data over the entire  
period. We adopt significance thresholds of 90% ( $p < 0.1$ ) for all trend analyses, and the percent increase or decrease is based  
on the mean concentrations or total column densities over each period.

In section 3.2.1, we present and discuss trends results for mean annual, wet and dry seasons of ground-based concentrations  
and IASI NH<sub>3</sub> total column densities in the three main ecosystems using MK test coupled to SS. The section 3.2.2 focuses on  
505 long term trends based on monthly data of NH<sub>3</sub> ground-based concentrations and total column densities at the six stations by  
using the SK test coupled to SKS. In these sections, we present only the results of significant trends. In the paragraph preceding

the conclusion of the paper, we present a general comment on the trends obtained for each ecosystem and explain the differences obtained between ground-based concentration and total column density measurement trends.

Reported ground-based NH<sub>3</sub> concentration and IASI NH<sub>3</sub> trends are analyzed in the light of NH<sub>3</sub> emissions from ~~all~~ combustion, biomass burning and anthropic sources (described in section 2.3), meteorological (air temperature and rainfall) and physical (LAI) parameters when available, which influence the atmospheric level of NH<sub>3</sub>.

### 3.2.1 Annual trends

Globally, results indicate decreasing annual, wet and dry season trends in ground-based NH<sub>3</sub> concentrations for the three ecosystems except at Bomassa, but increasing trends in IASI NH<sub>3</sub> total column densities. At the annual scale, results show there is no simultaneous trend for ground-based concentrations and total column densities of NH<sub>3</sub> at the same site.

Results indicate significant increases in IASI NH<sub>3</sub> total column densities at the dry savanna of Katibougou site of  $+0.340 \times 10^{15}$  molec cm<sup>-2</sup> yr<sup>-1</sup> (+3.4698% yr<sup>-1</sup>), ~~and~~ at the wet savanna of Djougou site of  $+0.4237 \times 10^{15}$  molec cm<sup>-2</sup> yr<sup>-1</sup> (+2.6524 % yr<sup>-1</sup>) ~~and at the forest of Zoétélé of  $+0.47 \times 10^{15}$  molec cm<sup>-2</sup> yr<sup>-1</sup> (+3.42% yr<sup>-1</sup>)~~ over the 11-year period. Surprisingly, for the forested ecosystem, annual ground-based NH<sub>3</sub> concentrations register an increasing trend at Bomassa of +0.14 ppb yr<sup>-1</sup> (+2.56 % yr<sup>-1</sup>) but a decreasing trend at Zoétélé of -0.10 ppb yr<sup>-1</sup> (-2.95 % yr<sup>-1</sup>) over 21-year period.

We also investigate potential trends by applying the non-parametric MK test coupled to SS to the annual average of wet and dry seasons (separately) at the six stations representing the great ecosystems in Sub Saharan Africa. We observe in the wet season that NH<sub>3</sub> concentrations decrease at Katibougou in Malian dry savanna by -0.22 ppb yr<sup>-1</sup> (-3.25% yr<sup>-1</sup>), and at Zoétélé in Cameroon's forest ecosystem by -0.11 ppb yr<sup>-1</sup> (-3.24 % yr<sup>-1</sup>) but increase at the other forested site of Bomassa in ~~R~~Republic of Congo by +0.13 ppb yr<sup>-1</sup> (+2.29 % yr<sup>-1</sup>). Ground-based NH<sub>3</sub> concentrations in the dry season reveal decreasing trends in both dry savanna (-0.13 ppb yr<sup>-1</sup> or -2.41 % yr<sup>-1</sup> for Banizoumbou and -0.12 ppb yr<sup>-1</sup> or -2.26 % yr<sup>-1</sup> for Katibougou) and wet savanna (-0.08 ppb yr<sup>-1</sup> or -1.70 % yr<sup>-1</sup> for Lamto) sites. From satellite measurements, the ~~only~~-significant increasing trends ~~are~~ obtained from mean wet season-to-mean wet season for IASI NH<sub>3</sub> total column densities at Banizoumbou ( $+0.36 \times 10^{15}$  molec cm<sup>-2</sup> yr<sup>-1</sup> or 3.20% yr<sup>-1</sup>), Katibougou ( $+0.55 \times 10^{15}$  molec cm<sup>-2</sup> yr<sup>-1</sup> or 6.01% yr<sup>-1</sup>) and Djougou ( $+0.24 \times 10^{15}$  molec cm<sup>-2</sup> yr<sup>-1</sup> or 1.77% yr<sup>-1</sup>). In the dry season, we obtain increasing trends at Katibougou ( $+0.24 \times 10^{15}$  molec cm<sup>-2</sup> yr<sup>-1</sup> or 2.33% yr<sup>-1</sup>), Djougou ( $+0.69 \times 10^{15}$  molec cm<sup>-2</sup> yr<sup>-1</sup> or 3.54% yr<sup>-1</sup>) and Zoétélé ( $+1.37 \times 10^{15}$  molec cm<sup>-2</sup> yr<sup>-1</sup> or 6.24% yr<sup>-1</sup>). ~~Katibougou station with slopes of  $+0.65$  molec cm<sup>-2</sup> yr<sup>-1</sup> (+6.66 % yr<sup>-1</sup>) and  $+0.26$  molec cm<sup>-2</sup> yr<sup>-1</sup> (+2.55 % yr<sup>-1</sup>) in the wet and dry seasons, respectively.~~

To investigate the potential causes of the observed trends of NH<sub>3</sub> concentrations at Zoétélé, we have applied MK trend and Pearson's correlation tests to meteorological and NH<sub>3</sub> emission data from GFED4 databases. The results show the decreasing trend in ground-based NH<sub>3</sub> concentrations in the wet season at Zoétélé could be attributed to wet season-to-wet season increasing of the LAI (+0.69% yr<sup>-1</sup>), with a 99% significant anticorrelation of -0.57 between these two variables. We do not yet know the cause of the increase in LAI from one wet season to the next in the Zoétélé forest ecosystem. However, more

540 vegetation results in greater dry deposition rate, which would significantly reduce the observed wet season to wet season ground-based atmospheric NH<sub>3</sub> concentrations at Zoétélé. During the wet season, air humidity and soil moisture increase, leading to large NH<sub>3</sub> deposition on vegetation during wet months (Delon et al., 2019).

545 The increasing trends in IASI NH<sub>3</sub> total column densities at Katibougou (dry and wet seasons) and Djougou (annual, dry and wet seasons) are linked to emissions from the agricultural sector. Indeed, our results show significant correlations at 95% between satellite data and NH<sub>3</sub> emissions from agriculture at Katibougou ( $\tau = 0.75$  and  $0.96$  in dry and wet seasons, respectively) and Djougou ( $\tau = 0.72$ ,  $0.63$  and  $0.68$  for annual, dry season and wet seasons, respectively). In addition, MK test coupled to SS applied to agricultural NH<sub>3</sub> emissions provided by the CEDS database shows increasing trends for annual means (+2.51% yr<sup>-1</sup> at Djougou), annual average of wet season (+2.36% yr<sup>-1</sup> at Katibougou and +2.56% yr<sup>-1</sup> at Djougou) and annual average of dry season (+2.37% yr<sup>-1</sup> at Katibougou and +2.47% yr<sup>-1</sup> at Djougou) over the 2008-2018 period.

550

### 3.2.2 Trends accounting for seasonality

Long time series of atmospheric NH<sub>3</sub> could usually be affected by seasonality, which is the cyclical changes in concentrations or densities over the course of the year. The SK test is significantly robust in revealing trends in seasonal time series. In this section, we perform trend computations using SK coupled to SKS of monthly mean ground-based NH<sub>3</sub> concentrations and IASI NH<sub>3</sub> total column densities of the entire dataset. Results for only significant monthly trends ( $p < 0.1$ ) from all INDAAF sites are shown in Figure 8. In general, the statistical tests reveal significant decreasing trends for ground-based NH<sub>3</sub> concentrations (except at Bomassa), but increasing trends for IASI NH<sub>3</sub> total column densities (Figure 8).

555

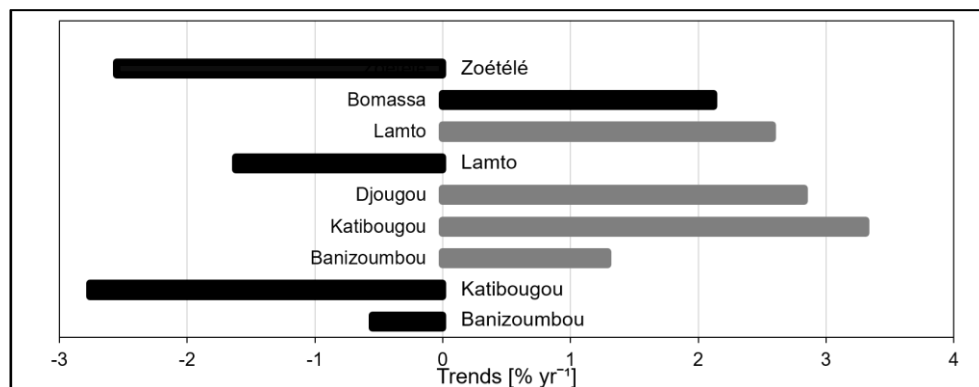

560 **Figure 88.** Estimated percentage changes in ground-based NH<sub>3</sub> concentrations (in black) and IASI NH<sub>3</sub> total column densities (in grey) for INDAAF network stations where monthly trends are significant at 90%. These trends are obtained using the monthly data of the overall database.

Mis en forme : Indice

Mis en forme : Indice

Mis en forme : Indice

565 Ground-based NH<sub>3</sub> concentrations decrease in the dry savannas of Banizoumbou by -0.03 ppb yr<sup>-1</sup> (-0.55 % yr<sup>-1</sup>) and Katibougou by -0.16 ppb yr<sup>-1</sup> (-2.76 % yr<sup>-1</sup>), but IASI NH<sub>3</sub> total column densities increase at the same sites by +0.14 x 10<sup>15</sup> molec cm<sup>-2</sup> yr<sup>-1</sup> (+1.29 % yr<sup>-1</sup>) and Katibougou by +0.3340 x 10<sup>15</sup> molec cm<sup>-2</sup> yr<sup>-1</sup> (+3.314.00 % yr<sup>-1</sup>), respectively. A significant decreasing trend is also found for ground-based NH<sub>3</sub> concentrations in the wet savanna of Lamto (-0.06 ppb yr<sup>-1</sup> or -1.62 % yr<sup>-1</sup>), but significant increasing trends are obtained for IASI NH<sub>3</sub> total column densities both at Djougou (+0.459 x 10<sup>15</sup> molec cm<sup>-2</sup> yr<sup>-1</sup> or +2.8394 % yr<sup>-1</sup>) and Lamto (+0.534 x 10<sup>15</sup> molec cm<sup>-2</sup> yr<sup>-1</sup> or +2.581.60 % yr<sup>-1</sup>) sites. SK test applied to monthly ground-based NH<sub>3</sub> concentrations in the forested ecosystem sites shows significant increasing trend by +0.12 ppb yr<sup>-1</sup> (+2.12 % yr<sup>-1</sup>) at Bomassa, but decreasing trend by -0.09 ppb yr<sup>-1</sup> (-2.55 % yr<sup>-1</sup>) at Zoétélé. The increasing trend of IASI NH<sub>3</sub> total column densities at Bomassa (+0.17 molec cm<sup>-2</sup> yr<sup>-1</sup> or +1.21 % yr<sup>-1</sup>) is three times lower than that of Zoétélé (+0.56 molec cm<sup>-2</sup> yr<sup>-1</sup> or +3.76 % yr<sup>-1</sup>). On the contrary, we obtained no significant trends for IASI NH<sub>3</sub> total column densities in the forested zone

575 The SK test applied to monthly data from January, 1998 to December, 2018 shows that relative humidity decreases by -0.15% yr<sup>-1</sup> at Lamto. We calculate Pearson's correlation between ground-based NH<sub>3</sub> concentrations and relative humidity and we find a coefficient of -0.50 significant at 99%. This statistical test demonstrates that the decreasing monthly trend of ground-based NH<sub>3</sub> concentrations cannot be explained by the monthly relative humidity trend.

In the dry savanna ecosystem, we believe that the simplest explanation for the increasing trend of IASI NH<sub>3</sub> total column densities observed at Katibougou is the significant increasing trend of NH<sub>3</sub> emissions by agricultural activities (+2.33% yr<sup>-1</sup>) for the period 2008-2018. In the wet savanna ecosystems, we suggest that the increase in agricultural emissions of NH<sub>3</sub> (+2.02% yr<sup>-1</sup>) and air temperature (+0.06°C yr<sup>-1</sup>) for the period 2008-2018 at Djougou could be responsible for the increasing trend in IASI NH<sub>3</sub> total column densities at this site, with 99% significant correlation coefficients of 0.36 and 0.65, respectively.

At Lamto, the increase in total column densities of NH<sub>3</sub> could be attributed to increases in air temperature (+0.14°C yr<sup>-1</sup>) and emissions of NH<sub>3</sub> by agricultural activities (+2.3% yr<sup>-1</sup>) over the period 2008-2018. Indeed, there are significant linear correlations between IASI NH<sub>3</sub> and air temperature ( $\tau = 0.72, p < 0.01$ ), and between IASI NH<sub>3</sub> and agricultural emissions of NH<sub>3</sub> ( $\tau = 0.50, p < 0.01$ ). At the forested ecosystem of Bomassa, our results show that monthly air temperature and NH<sub>3</sub> emissions by anthropogenic sources (residential and agriculture) contribute to the increasing of ground-based concentrations and total column densities of NH<sub>3</sub>. Indeed, during ground-based concentrations and IASI total column densities observations,

590 we find increasing trends of air temperature (1998-2018 : +0.03°C yr<sup>-1</sup>, 2008-2018 : +0.02°C yr<sup>-1</sup>), NH<sub>3</sub> emissions from residential (1998-2018 : +5.78% yr<sup>-1</sup>, 2008-2018 : +4.74% yr<sup>-1</sup>) and agriculture (1998-2018 : +4.46% yr<sup>-1</sup>, 2008-2018 : +1.52% yr<sup>-1</sup>) sectors at Bomassa. In addition, our study shows that monthly air temperature and these anthropogenic sources of NH<sub>3</sub>

Mis en forme : Indice

Mis en forme : Espace Avant : 12 pt, Interligne : Double

Mis en forme : Indice

Mis en forme : Indice

Mis en forme : Police :Italique

are significantly correlated with ground-based and IASI NH<sub>3</sub> at Bomassa over these two periods of data. We assume that increasing trends of atmospheric NH<sub>3</sub> at Bomassa are due to air temperature, residential and agricultural NH<sub>3</sub> emissions.

595 Trend studies of NH<sub>3</sub> concentrations and densities obtained respectively with the INDAAF passive samplers and the IASI instrument have shown significant trends depending on each biome. Overall, we obtained decreasing trends for ground-based measurements (except at the Bomassa forest site), but increasing trends for IASI total column densities of NH<sub>3</sub>: This result was found for all ecosystems(except in forest ecosystems). The long-term statistical trend results for NH<sub>3</sub> emissions from GFED4 database are not significant, so biomass burning could not explain the trends obtained for the ground-based and satellite data. However, meteorological and anthropogenic emission data from CEDS clearly show that the drivers of atmospheric NH<sub>3</sub> trends in the (1) dry savanna of Katibougou is agriculture, (2) wet savanna of Djougou and Lamto are air temperature and agriculture, and (3) forest of Bomassa are air temperature, residential and agriculture.

600 A plausible explanation for the contrasting trends between surface concentrations and satellite columns could be the impact of biomass burning plumes.

605 In our study, satellite observations integrated across a 100 km centered around each site can be expected due to the very different nature of the observations. IASI provides a total column value, which we have averaged over an area of roughly 100 square miles for each station comparison. The surface stations provide a point measurement at the surface. So any differences between a) surface concentrations and concentrations at any other altitude in the atmosphere or b) between composition at the station and at any other point in the 100 square-mile area can produce a mis-match between the station observations and the

610 IASI retrieval. In addition, NH<sub>3</sub> plumes from the combustion of biomass from distant sources. The latter are likely less well captured from INDAAF passive samplers, while they are very well measured by IASI (Zheng et al., 2021). It is likely that IR sounders have a higher sensitivity to fire plumes, which are located higher in the atmosphere (and so the ground-based measurements will show less sensitivity to them).

Mis en forme : Indice

#### 615 **4 Conclusion**

Using a 21-year period of INDAAF passive samplers and an 11-year period of IASI product, we have characterized coevolutions and trends of atmospheric NH<sub>3</sub> at six stations of the INDAAF network in the African dry savanna (Banizoumbou, Niger and Katibougou, Mali), wet savanna (Djougou, Benin and Lamto, Côte d'Ivoire) and forest (Bomassa, Republic of Congo and Zoétélé, Cameroon). The remote sensing data is intended as a complement to the surface data, to provide some insight into local dynamics near each surface station. The results showed that ground-based concentrations of NH<sub>3</sub> and IASI NH<sub>3</sub> total column densities are significantly higher ~~more important~~ in the dry savanna and wet savanna ecosystems, respectively. Indeed, mean annual ground-based concentrations of NH<sub>3</sub> over periods 1998/2005-2018 period are 5.7-5.8 ppb

625 in dry savanna, 3.5-4.7 ppb in wet savanna and 3.4-5.6 ppb in forest ecosystems. The overall mean annual IASI NH<sub>3</sub> total column densities for a ~~circle with a diameter of 100 km<sup>1° x 1° grid cell</sup>~~ centered on each site over 2008-2018 are 10.1-11.0 x 10<sup>15</sup> molec cm<sup>-2</sup> in the dry savanna, 16.5-21.4 x 10<sup>15</sup> molec cm<sup>-2</sup> in the wet savanna and 14.3-15.1 x 10<sup>15</sup> molec cm<sup>-2</sup> in the forest ecosystems. If we consider only ground-based measurements, the results show that NH<sub>3</sub> emissions from Sahelian soils, livestock and agriculture (only at Katibougou) in the dry savanna ecosystem lead to average concentrations in the dry season that are equal to those obtained in the wet savanna ecosystem, globally dominated by biomass burning and agriculture. soils and livestock in the dry savanna ecosystem are higher than those from biomass burning in the wet savanna and forest ecosystems.

630 We have recorded 95% significant Pearson correlation between monthly ground-based concentrations and IASI total column densities of NH<sub>3</sub> at Banizoumbou ( $r=0.3$ ), Lamto ( $r=0.59$ ), Bomassa ( $r=0.23$ ) and Zoétélé ( $r=0.36$ ), showing that NH<sub>3</sub> abundancies at the wet savanna of Lamto show the best agreement between ground-based and satellite remote sensing. In the dry savanna sites of Banizoumbou and Katibougou, the seasonal ground-based concentrations of NH<sub>3</sub> are highest both at the beginning and the end of the wet season. Conversely, ground-based concentrations of NH<sub>3</sub> are highest in the dry season at the wet savanna sites of Djougou and Lamto, but no marked seasonality between wet and dry season was observed for ground-based NH<sub>3</sub> concentrations in the forest sites of Bomassa and Zoétélé. IASI NH<sub>3</sub> total column densities follow the same seasonality as ground-based NH<sub>3</sub> concentrations in the dry and wet savannas, while the seasonality is more marked in the forested ecosystem.

640 The non-parametric Mann-Kendall statistical trend test shows 90% significant mean annual increasing trend for IASI NH<sub>3</sub> total column densities which is the most important in the dry savanna of Katibougou (+3.98 % yr<sup>-1</sup>). Ground-based NH<sub>3</sub> concentrations in the forested ecosystem increase at Bomassa (+2.56 % yr<sup>-1</sup>), but decrease at Zoétélé (-2.95 % yr<sup>-1</sup>). In both dry and wet seasons, ground-based NH<sub>3</sub> concentrations decrease from -3.25% yr<sup>-1</sup> (Katibougou) to -1.70% yr<sup>-1</sup> (Lamto), but increase in wet season at Bomassa (+2.29% yr<sup>-1</sup>). IASI NH<sub>3</sub> total column densities increase in the wet season (+6.66% yr<sup>-1</sup>) and dry season (+2.55% yr<sup>-1</sup>) only at Katibougou, Mali. The seasonal Kendall test applied to monthly data over the entire periods also shows decreasing trends at all the sites, except at Bomassa (+2.12% yr<sup>-1</sup>) for ground-based NH<sub>3</sub> concentrations. In contrast to trends calculated using ground-based observations, monthly IASI NH<sub>3</sub> total column densities increase for all ecosystems, ranging from +1.21% yr<sup>-1</sup> (Bomassa) to +4.00% yr<sup>-1</sup> (Katibougou). The increasing trends observed in dry seasons of wet savanna and forest African ecosystems could be attributed to a longer residence time of NH<sub>3</sub> from biomass burning and agricultural waste burning sources in the atmosphere which are the main sources of atmospheric NH<sub>3</sub> in this season. Decreasing trend in ground-based NH<sub>3</sub> concentrations in the wet season at Zoétélé could be related to wet season-to-wet season increasing of the LAI (+0.69% yr<sup>-1</sup>), with a 99% significant anticorrelation of -0.57 between these two variables. Emission inventories have inherent uncertainties that may come from activity data and emission factors, or even missing emission sources. In terms of measurement data, the monthly averaged data mask considerable diurnal variability in NH<sub>3</sub> concentrations. Drivers contributing to this variability include the influence of physical and meteorological parameters, and influence of local emission sources and interactions with others atmospheric compounds on INDAAF sites.

Mis en forme : Indice

Results reported in this paper represent the unique long-term regional characterization of ground-based NH<sub>3</sub> concentrations in Africa. Our study allows a better understanding of the main drivers of atmospheric NH<sub>3</sub> level of concentrations and trends. More field campaigns and experiments to highlight others sources (soils, livestock, fertilizer quantities, ...) is still necessary before obtaining a definitive answer to decreasing trends in ground-based concentrations of NH<sub>3</sub> at the INDAAF sites. The NitroAfrica project (2023-2026) will help fill some of these gaps with valuable data on nitrogen in rural Africa. The overall objective of NitroAfrica project is to study –coupling field experiments and different modelling approaches– the relationships and retroactions between atmospheric N deposition, N cycling in the soil-vegetation system, emissions of reactive N forms by the surface to the atmosphere, atmospheric chemistry and regional climate. We conclude that the main atmospheric NH<sub>3</sub> sources are alkaline Sahelian soils and agro-pastoralism emissions along the dry savanna ecosystem. NH<sub>3</sub> variability in the wet savanna and forest ecosystems emphasized the importance of two main sources, i.e., biomass burning and agricultural waste burning.

#### **Data availability**

670 The INDAAF NH<sub>3</sub> observations are available at <https://indaaf.obs-mip.fr/> upon registration. TRMM 3B42 precipitation data are available from <https://pmm.nasa.gov/data-access/downloads/trmm>. The IASI NH<sub>3</sub> data are available from The IASI <https://iasi.aeris-data.fr>.

#### **Author contribution**

675 Money Ossohou designed the study, conducted the statistical analysis, and wrote the paper.  
Jonathan Hickman, and Corinne Galy-Lacaux contributed to study design and edited the paper.  
Lieven Clarisse, Pierre-François Coheur, and Martin Van Damme developed the original IASI trace gas retrievals and edited the paper.  
680 Marcellin Adon, and Véronique Yoboué edited the paper.  
Eric Gardrat, and Maria Dias Alvès analysed the samples.

#### **Competing interests**

The authors declare that they have no conflict of interest.

#### **Disclaimer**

685 Publisher's note : Copernicus Publications remains neutral with regard to jurisdictional claims in published maps and institutional affiliations.



## Acknowledgement

This paper is part of the INDAAF (International Network to study Deposition and Atmospheric chemistry in Africa) long-term project supported by the CNRS/INSU (Centre National de la Recherche Scientifique / Institut National des Sciences de l'Univers), by the ACTRIS-FR research infrastructure and by the IRD (Institut de Recherche pour le Développement). We are particularly grateful to all INDAAF local field technicians, for their work. This study has received funding from the European Union's Horizon 2020 research and innovation programme under the Marie Skłodowska-Curie Grant Agreement No. 871944. This work was supported by the CNES. IASI has been developed and built under the responsibility of the Centre National d'Études Spatiales (CNES, France). It is flown on board the Metop satellites as part of the EUMETSAT Polar System. The research in Belgium was funded by the Belgian State Federal Office for Scientific, Technical and Cultural Affairs (Prodex HIRS) and the Air Liquide Foundation (TAPIR project). This work is also partly supported by the FED-tWIN project ARENBERG funded via the Belgian Science Policy Office (BELSPO). L. Clarisse is Research Associate supported by the Belgian F.R.S.-FNRS.

## References

- Abbadie, L. (Ed.): *Lamto: structure, functioning, and dynamics of a savanna ecosystem*, Springer Science+Business Media, New York, 415 pp., 2006.
- Addinsoft: *XLSTAT statistical and data analysis solution*. Paris, France. <https://www.xlstat.com/fr>, 2022.
- Adon, M., Galy-Lacaux, C., Yoboué, V., Delon, C., Lacaux, J. P., Castera, P., Gardrat, E., Pienaar, J., Al-Ourabi, H., Laouali, D., Diop, B., Sigha-Nkamdjou, L., Akpo, A., Tathy, J. P., Lavenu, F., and Mougín, E.: Long-term measurements of sulfur dioxide, nitrogen dioxide, ammonia, nitric acid and ozone in Africa using passive samplers, *Atmospheric Chemistry and Physics*, 10, 7467–7487, <https://doi.org/10.5194/acp-10-7467-2010>, 2010.
- Adon, M., Galy-Lacaux, C., Delon, C., Yoboué, V., Solmon, F., and Kaptue Tehuente, A. T.: Dry deposition of nitrogen compounds (NO<sub>2</sub>, NO, NH<sub>3</sub>), sulfur dioxide and ozone in west and central African ecosystems using the inferential method, *Atmospheric Chemistry and Physics*, 13, 11351–11374, <https://doi.org/10.5194/acp-13-11351-2013>, 2013.
- Akpo, A. B., Galy-Lacaux, C., Laouali, D., Delon, C., Lioussé, C., Adon, M., Gardrat, E., Mariscal, A., and Darakpa, C.: Precipitation chemistry and wet deposition in a remote wet savanna site in West Africa: Djougou (Benin), *Atmospheric Environment*, 115, 110–123, <https://doi.org/10.1016/j.atmosenv.2015.04.064>, 2015.
- Andreae, M. O. and Merlet, P.: Emission of trace gases and aerosols from biomass burning, *Global Biogeochemical Cycles*, 15, 955–966, <https://doi.org/10.1029/2000GB001382>, 2001.
- Baek, B. H., Aneja, V. P., and Tong, Q.: Chemical coupling between ammonia, acid gases, and fine particles, *Environ. Pollut.*, 129, 89–98, 2004.
- Bahino, J., Yoboué, V., Galy-Lacaux, C., Adon, M., Akpo, A., Keita, S., Lioussé, C., Gardrat, E., Chiron, C., Ossohou, M., Gnamien, S., and Djessou, J.: A pilot study of gaseous pollutants' measurement (NO<sub>2</sub>, SO<sub>2</sub>, NH<sub>3</sub>, HNO<sub>3</sub> and O<sub>3</sub>) in Abidjan,

Côte d'Ivoire: contribution to an overview of gaseous pollution in African cities, *Atmospheric Chemistry and Physics*, 18, 5173–5198, <https://doi.org/10.5194/acp-18-5173-2018>, 2018.

720 Beale, C. A., Paulot, F., Randles, C. A., Wang, R., Guo, X., Clarisse, L., Van Damme, M., Coheur, P. F., Clerbaux, C., Shephard, M. W., Dammers, E., Cady Pereira, K., and Zondlo, M. A.: Large sub-regional differences of ammonia seasonal patterns over India reveal inventory discrepancies, *Environ. Res. Lett.*, 17, 104006, <https://doi.org/10.1088/1748-9326/ac881f>, 2022.

725 Behera, S. N., Sharma, M., Aneja, V. P., and Balasubramanian, R.: Ammonia in the atmosphere: a review on emission sources, atmospheric chemistry and deposition on terrestrial bodies, *Environ Sci Pollut Res*, 20, 8092–8131, <https://doi.org/10.1007/s11356-013-2051-9>, 2013.

Beusen, A. H. W., Bouwman, A. F., Heuberger, P. S. C., Van Drecht, G., and Van Der Hoek, K. W.: Bottom-up uncertainty estimates of global ammonia emissions from global agricultural production systems, *Atmospheric Environment*, 42, 6067–6077, <https://doi.org/10.1016/j.atmosenv.2008.03.044>, 2008.

730 Bouwman, A. F. and Van Der Hoek, K. W.: Scenarios of animal waste production and fertilizer use and associated ammonia emission for the developing countries, *Atmospheric Environment*, 31, 4095–4102, [https://doi.org/10.1016/S1352-2310\(97\)00288-4](https://doi.org/10.1016/S1352-2310(97)00288-4), 1997.

735 Bouwman, A. F., Lee, D. S., Asman, W. A. H., Dentener, F. J., Van Der Hoek, K. W., and Olivier, J. G. J.: A global high-resolution emission inventory for ammonia, *Global Biogeochemical Cycles*, 11, 561–587, <https://doi.org/10.1029/97GB02266>, 1997.

Bouwman, A. F., Van Vuuren, D. P., Derwent, R. G., and Posch, M.: A Global Analysis of Acidification and Eutrophication of Terrestrial Ecosystems, *Water, Air, and Soil Pollution*, 141, 349–382, <https://doi.org/10.1023/A:1021398008726>, 2002a.

740 Bouwman, A. F., Boumans, L. J. M., and Batjes, N. H.: Estimation of global NH<sub>3</sub> volatilization loss from synthetic fertilizers and animal manure applied to arable lands and grasslands: AMMONIA EMISSION FROM FERTILIZERS, *Global Biogeochem. Cycles*, 16, 8–18–14, <https://doi.org/10.1029/2000GB001389>, 2002b.

Clarisse, L., Clerbaux, C., Dentener, F., Hurtmans, D., and Coheur, P.-F.: Global ammonia distribution derived from infrared satellite observations, *Nature Geosci*, 2, 479–483, <https://doi.org/10.1038/ngeo551>, 2009.

745 Clarisse, L., Shephard, M. W., Dentener, F., Hurtmans, D., Cady Pereira, K., Karagulian, F., Van Damme, M., Clerbaux, C., and Coheur, P. F.: Satellite monitoring of ammonia: A case study of the San Joaquin Valley, *J. Geophys. Res.*, 115, D13302, <https://doi.org/10.1029/2009JD013291>, 2010.

Clarisse, L., Van Damme, M., Gardner, W., Coheur, P. F., Clerbaux, C., Whitburn, S., Hadji-Lazaro, J., and Hurtmans, D.: Atmospheric ammonia (NH<sub>3</sub>) emanations from Lake Natron's saline mudflats, *Sci Rep*, 9, 4441, <https://doi.org/10.1038/s41598-019-39935-3>, 2019.

750 Coheur, P. F., Clarisse, L., Turquety, S., Hurtmans, D., and Clerbaux, C.: IASI measurements of reactive trace species in biomass burning plumes, *Atmospheric Chemistry and Physics*, 9, 5655–5667, <https://doi.org/10.5194/acp-9-5655-2009>, 2009.

Crutzen, P. J. and Andreae, M. O.: Biomass Burning in the Tropics: Impact on Atmospheric Chemistry and Biogeochemical Cycles, *Science*, 250, 1669–1678, <https://doi.org/10.1126/science.250.4988.1669>, 1990.

Dammers, E., Shephard, M. W., Palm, M., Cady Pereira, K., Capps, S., Lutsch, E., Strong, K., Hannigan, J. W., Ortega, I., Toon, G. C., Stremme, W., Grutter, M., Jones, N., Smale, D., Siemons, J., Hrpeek, K., Tremblay, D., Schaap, M., Notholt, J.,

- 755 and Erisman, J. W.: Validation of the CrIS fast physical NH<sub>3</sub>; retrieval with ground-based FTIR, *Atmos. Meas. Tech.*, **10**, 2645–2667, <https://doi.org/10.5194/amt-10-2645-2017>, 2017.
- Delmas, R., Lacaux, J. P., Menaut, J. C., Abbadie, L., Le Roux, X., Helas, G., and Lobert, J.: Nitrogen compound emission from biomass burning in tropical African savanna FOS/DECAFE 1991 experiment (Lamto, Ivory Coast), *J Atmos Chem*, **22**, 175–193, <https://doi.org/10.1007/BF00708188>, 1995.
- 760 Delon, C., Galy-Lacaux, C., Boone, A., Lioussé, C., Serça, D., Adon, M., Diop, B., Akpo, A., Lavenu, F., Mougín, E., and others: Atmospheric nitrogen budget in Sahelian dry savannas, *Atmospheric Chemistry and Physics*, **10**, 2691–2708, 2010.
- Delon, C., Galy-Lacaux, C., Adon, M., Lioussé, C., Serça, D., Diop, B., and Akpo, A.: Nitrogen compounds emission and deposition in West African ecosystems: comparison between wet and dry savanna, *Biogeosciences*, **9**, 385–402, <https://doi.org/10.5194/bg-9-385-2012>, 2012.
- 765 Delon, C., Galy-Lacaux, C., Serça, D., Loubet, B., Camara, N., Gardrat, E., Saneh, I., Fensholt, R., Tagesson, T., Le Dantec, V., Sambou, B., Diop, C., and Mougín, E.: Soil and vegetation atmosphere exchange of NO, NH<sub>3</sub>, and N<sub>2</sub>O from field measurements in a semi arid grazed ecosystem in Senegal, *Atmospheric Environment*, **156**, 36–51, <https://doi.org/10.1016/j.atmosenv.2017.02.024>, 2017.
- 770 Delon, C., Galy-Lacaux, C., Serça, D., Personne, E., Mougín, E., Adon, M., Le Dantec, V., Loubet, B., Fensholt, R., and Tagesson, T.: Modelling land-atmosphere daily exchanges of NO, NH<sub>3</sub>, and CO<sub>2</sub> in a semi-arid grazed ecosystem in Senegal, *Biogeosciences*, **16**, 2049–2077, <https://doi.org/10.5194/bg-16-2049-2019>, 2019.
- Diawara, A., Yoroba, F., Kouadio, K. Y., Kouassi, K. B., Assamoi, E. M., Diedhiou, A., and Assamoi, P.: Climate Variability in the Sudano-Guinean Transition Area and Its Impact on Vegetation: The Case of the Lamto Region in Côte D'Ivoire, *Advances in Meteorology*, 2014, 1–11, <https://doi.org/10.1155/2014/831414>, 2014.
- 775 Erisman, J. W., Galloway, J. N., Seitzinger, S., Bleeker, A., Dise, N. B., Petrescu, A. M. R., Leach, A. M., and de Vries, W.: Consequences of human modification of the global nitrogen cycle, *Phil. Trans. R. Soc. B*, **368**, 20130116, <https://doi.org/10.1098/rstb.2013.0116>, 2013.
- 780 Feng, L., Smith, S. J., Braun, C., Crippa, M., Gidden, M. J., Hoelsy, R., Klimont, Z., van Marle, M., van den Berg, M., and van der Werf, G. R.: Gridded Emissions for CMIP6, *Climate and Earth System Modeling*, <https://doi.org/10.5194/gmd-2019-195>, 2019.
- Ferm, M.: A sensitive Diffusional Sampler., IVL publication B—1020, 1–12, 1991.
- Fowler, D., Sutton, M. A., Smith, R. I., Pitcairn, C. E. R., Coyle, M., Campbell, G., and Stedman, J.: Regional mass budgets of oxidized and reduced nitrogen and their relative contribution to the nitrogen inputs of sensitive ecosystems, *Environmental Pollution*, **102**, 337–342, [https://doi.org/10.1016/S0269-7491\(98\)80052-3](https://doi.org/10.1016/S0269-7491(98)80052-3), 1998.
- 785 Galloway, J. N., Dentener, F. J., Capone, D. G., Boyer, E. W., Howarth, R. W., Seitzinger, S. P., Asner, G. P., Cleveland, C. C., Green, P. A., Holland, E. A., Karl, D. M., Michaels, A. F., Porter, J. H., Townsend, A. R., and Vöösmary, C. J.: Nitrogen Cycles: Past, Present, and Future, *Biogeochemistry*, **70**, 153–226, <https://doi.org/10.1007/s10533-004-0370-0>, 2004.
- 790 Giglio, L., Randerson, J. T., van der Werf, G. R., Kasibhatla, P. S., Collatz, G. J., Morton, D. C., and DeFries, R. S.: Assessing variability and long-term trends in burned area by merging multiple satellite fire products, *Biogeosciences*, **7**, 1171–1186, <https://doi.org/10.5194/bg-7-1171-2010>, 2010.

- Giglio, L., Randerson, J. T., and van der Werf, G. R.: Analysis of daily, monthly, and annual burned area using the fourth-generation global fire emissions database (GFED4): ANALYSIS OF BURNED AREA, *Journal of Geophysical Research: Biogeosciences*, 118, 317–328, <https://doi.org/10.1002/jgrg.20042>, 2013.
- 795 Guo, X., Wang, R., Pan, D., Zondlo, M. A., Clarisse, L., Van Damme, M., Whitburn, S., Coheur, P., Clerbaux, C., Franco, B., Golston, L. M., Wendt, L., Sun, K., Tao, L., Miller, D., Mikoviny, T., Müller, M., Wisthaler, A., Tevlin, A. G., Murphy, J. G., Nowak, J. B., Roseoli, J. R., Volkamer, R., Kille, N., Neuman, J. A., Eilerman, S. J., Crawford, J. H., Yacovitch, T. I., Barriek, J. D., and Searino, A. J.: Validation of IASI Satellite Ammonia Observations at the Pixel Scale Using In Situ Vertical Profiles, *JGR Atmospheres*, 126, <https://doi.org/10.1029/2020JD033475>, 2021.
- 800 Hickman, J. E., Dammers, E., Galy-Lacaux, C., and van der Werf, G. R.: Satellite evidence of substantial rain-induced soil emissions of ammonia across the Sahel, *Atmospheric Chemistry and Physics*, 18, 16713–16727, <https://doi.org/10.5194/acp-18-16713-2018>, 2018.
- Hickman, J. E., Andela, N., Dammers, E., Clarisse, L., Coheur, P. F., Damme, M. V., Vittorio, C. A. D., Ossouhou, M., Galy-Lacaux, C., Tsigaridis, K., and Bauer, S. E.: Changes in biomass burning, wetland extent, or agriculture drive atmospheric NH<sub>3</sub> trends in select African regions, *Atmos. Chem. Phys.*, 15, 2021.
- 805 Hirsch, R. M., Slack, J. R., and Smith, R. A.: Techniques of trend analysis for monthly water quality data, *Water Resour. Res.*, 18, 107–121, <https://doi.org/10.1029/WR018i001p0107>, 1982.
- Hoesly, R. M., Smith, S. J., Feng, L., Klimont, Z., Janssens-Maenhout, G., Pitkanen, T., Seibert, J. J., Vu, L., Andres, R. J., Bolt, R. M., Bond, T. C., Dawidowski, L., Kholod, N., Kurokawa, J., Li, M., Liu, L., Lu, Z., Moura, M. C. P., O'Rourke, P. R., and Zhang, Q.: Historical (1750–2014) anthropogenic emissions of reactive gases and aerosols from the Community Emissions Data System (CEDS), *Geosci. Model Dev.*, 11, 369–408, <https://doi.org/10.5194/gmd-11-369-2018>, 2018.
- 810 Huffman, G. J., Bolvin, D. T., Nelkin, E. J., Wolff, D. B., Adler, R. F., Gu, G., Hong, Y., Bowman, K. P., and Stocker, E. F.: The TRMM Multisatellite Precipitation Analysis (TMPA): Quasi-Global, Multiyear, Combined-Sensor Precipitation Estimates at Fine Scales, *Journal of Hydrometeorology*, 8, 38–55, <https://doi.org/10.1175/JHM560.1>, 2007.
- 815 Jaeglé, L., Martin, R. V., Chance, K., Steinberger, L., Kurosu, T. P., Jacob, D. J., Modi, A. I., Yoboué, V., Sigha-Nkamdjou, L., and Galy-Lacaux, C.: Satellite mapping of rain-induced nitric oxide emissions from soils, *J. Geophys. Res.*, 109, D21310, <https://doi.org/10.1029/2004JD004787>, 2004.
- Kendall, M. G.: *Rank Correlation Methods*, 4th ed., Charles Griffin: London, 1975.
- Koziel, J. A., Aneja, V. P., and Baek, B. H.: Gas to Particle Conversion Process between Ammonia, Acid Gases, and Fine Particles in the Atmosphere, 26, 2006.
- 820 Kumar, M., Parmar, K. S., Kumar, D. B., Mhawish, A., Broday, D. M., Mall, R. K., and Banerjee, T.: Long-term aerosol climatology over Indo-Gangetic Plain: Trend, prediction and potential source fields, *Atmospheric Environment*, 180, 37–50, <https://doi.org/10.1016/j.atmosenv.2018.02.027>, 2018.
- 825 Le Roux, X., Abbadie, L., Fritz, H., and Leriche, H.: Modification of the Savanna Functioning by Herbivores, in: Lamto, vol. 179, edited by: Abbadie, L., Gignoux, J., Le Roux, X., and Lepage, M., Springer New York, New York, NY, 185–198, [https://doi.org/10.1007/978-0-387-33857-6\\_10](https://doi.org/10.1007/978-0-387-33857-6_10), 2006.
- Levine, J. S. (Ed.): *Biomass burning and global change*, MIT Press, Cambridge, Mass., 2 pp., 1996.

- 830 Lobert, J. M., Scharffe, D. H., Hao, W. M., and Crutzen, P. J.: Importance of biomass burning in the atmospheric budgets of nitrogen-containing gases, *Nature*, 346, 552–554, <https://doi.org/10.1038/346552a0>, 1990.
- Lutsch, E., Strong, K., Jones, D. B. A., Ortega, I., Hannigan, J. W., Dammers, E., Shephard, M. W., Morris, E., Murphy, K., Evans, M. J., Parrington, M., Whitburn, S., Van Damme, M., Clarisse, L., Coheur, P., Clerbaux, C., Croft, B., Martin, R. V., Pierce, J. R., and Fisher, J. A.: Unprecedented Atmospheric Ammonia Concentrations Detected in the High Arctic From the 2017 Canadian Wildfires, *J. Geophys. Res. Atmos.*, 124, 8178–8202, <https://doi.org/10.1029/2019JD030419>, 2019.
- 835 Malm, W. C., Schichtel, B. A., Pitchford, M. L., Ashbaugh, L. L., and Eldred, R. A.: Spatial and monthly trends in speciated fine particle concentration in the United States: SPECIATED FINE PARTICLE CONCENTRATION, *J. Geophys. Res.*, 109, n/a-n/a, <https://doi.org/10.1029/2003JD003739>, 2004.
- Mann, H. B.: Nonparametric Tests Against Trend, *Econometrica*, 13, 245–259, <https://doi.org/10.2307/1907187>, 1945.
- Mayaux, P., Bartholomé, E., Fritz, S., and Belward, A.: A new land cover map of Africa for the year 2000: New land cover map of Africa, *Journal of Biogeography*, 31, 861–877, <https://doi.org/10.1111/j.1365-2699.2004.01073.x>, 2004.
- 840 McCalley, C. K. and Sparks, J. P.: Controls over nitric oxide and ammonia emissions from Mojave Desert soils, *Oecologia*, 156, 871–881, <https://doi.org/10.1007/s00442-008-1031-0>, 2008.
- Mitani, M., Yamagiwa, J., Oko, R. A., Moutsamboté, J. M., Yumoto, T., and Maruhashi, T.: Approaches in Density Estimates and Reconstruction of Social Groups in a Western Lowland Gorilla Population in the Ndoki Forest, Northern Congo., *Tropics*, 2, 219–229, <https://doi.org/10.3759/tropics.2.219>, 1993.
- 845 Nicholson, S. E., Some, B., McCollum, J., Nelkin, E., Klotter, D., Berte, Y., Diallo, B. M., Gaye, I., Kpabeba, G., Ndiaye, O., Noukpozoukou, J. N., Tanu, M. M., Thiam, A., Toure, A. A., and Traore, A. K.: Validation of TRMM and Other Rainfall Estimates with a High Density Gauge Dataset for West Africa. Part I: Validation of GPCC Rainfall Product and Pre-TRMM Satellite and Blended Products, *Journal of Applied Meteorology*, 42, 1337–1354, [https://doi.org/10.1175/1520-0450\(2003\)042<1337:VOTAOR>2.0.CO;2](https://doi.org/10.1175/1520-0450(2003)042<1337:VOTAOR>2.0.CO;2), 2003.
- 850 O'Rourke, P., Smith, S., Mott, A., Ahsan, H., Meduffie, E., Crippa, M., Klimont, Z., Medonald, B., Wang, S., Nicholson, M., Hoesly, R., and Feng, L.: CEDS v\_2021\_04\_21 Gridded emissions data, [https://doi.org/10.25584/PNNLDATAHUB/1779095\\_2021](https://doi.org/10.25584/PNNLDATAHUB/1779095_2021).
- 855 Osohou, M., Galy-Lacaux, C., Yoboué, V., Hickman, J. E., Gardrat, E., Adon, M., Darras, S., Laouali, D., Akpo, A., Quafo, M., Diop, B., and Opepa, C.: Trends and seasonal variability of atmospheric NO<sub>2</sub> and HNO<sub>3</sub> concentrations across three major African biomes inferred from long-term series of ground-based and satellite measurements, *Atmospheric Environment*, 207, 148–166, <https://doi.org/10.1016/j.atmosenv.2019.03.027>, 2019.
- Osohou, M., Galy-Lacaux, C., Yoboué, V., Adon, M., Delon, C., Gardrat, E., Konaté, I., Ki, A., and Zouzou, R.: Long-term atmospheric inorganic nitrogen deposition in West African savanna over 16 year period (Lamto, Côte d'Ivoire), *Environ. Res. Lett.*, 16, 015004, <https://doi.org/10.1088/1748-9326/abd065>, 2020.
- 860 Quafo Leumbe, M. R., Galy-Lacaux, C., Liousse, C., Pont, V., Akpo, A., Doumbia, T., Gardrat, E., Zouiten, C., Sigha-Nkamdjou, L., and Ekodeck, G. E.: Chemical composition and sources of atmospheric aerosols at Djougou (Benin), *Meteorol Atmos Phys.*, 130, 591–609, <https://doi.org/10.1007/s00703-017-0538-5>, 2018.
- Pinder, R. W., Davidson, E. A., Goodale, C. L., Greaver, T. L., Herrick, J. D., and Liu, L.: Climate change impacts of US reactive nitrogen, *Proceedings of the National Academy of Sciences*, 109, 7671–7675, <https://doi.org/10.1073/pnas.1114243109>, 2012.

- 865 R-Core Team: R: A Language and Environment for Statistical Computing. R Foundation for Statistical Computing, Vienna, Austria. URL <https://www.R-project.org/>, <https://www.R-project.org/>, 2021.
- de Rouw, A. and Rajot, J. L.: Soil organic matter, surface crusting and erosion in Sahelian farming systems based on manuring or fallowing, *Agriculture, Ecosystems & Environment*, 104, 263–276, <https://doi.org/10.1016/j.agee.2003.12.020>, 2004.
- Sen: Estimates of the Regression Coefficient Based on Kendall's Tau., *J Am Stat Assoc.*, 63, 1379–1389, 1968.
- 870 Shadmani, M., Marofi, S., and Roknian, M.: Trend Analysis in Reference Evapotranspiration Using Mann-Kendall and Spearman's Rho Tests in Arid Regions of Iran, *Water Resources Management*, 26, 211–224, <https://doi.org/10.1007/s11269-011-9913-z>, 2012.
- Shi, Y., Matsunaga, T., and Yamaguchi, Y.: High Resolution Mapping of Biomass Burning Emissions in Three Tropical Regions, *Environ. Sci. Technol.*, 49, 10806–10814, <https://doi.org/10.1021/acs.est.5b01598>, 2015.
- 875 Sigha, Nkamdjou L., Galy-Lacaux, C., Pont, V., Richard, S., Sighomnou, D., and Lacaux, J. P.: Rainwater Chemistry and Wet-Deposition over the Equatorial Forested Ecosystem of Zoétélé (Cameroon), *J. Atmos. Chem.*, 46, 173–198, <https://doi.org/10.1023/A:1026057413640>, 2003.
- Smith, J. S., Zhou, Y., Kyle, P., Wang, H., and Yu, H.: A Community Emissions Data System (CEDS): Emissions For CMIP6 and Beyond, *International Emission Inventory Conference 101*, 19395–19409, 2015.
- 880 Soper, F. M., Groffman, P. M., and Sparks, J. P.: Denitrification in a subtropical, semi-arid North American savanna: field measurements and intact soil core incubations, *Biogeochemistry*, 128, 257–266, <https://doi.org/10.1007/s10533-016-0205-9>, 2016.
- Stevens, C. J., David, T. I., and Storkey, J.: Atmospheric nitrogen deposition in terrestrial ecosystems: Its impact on plant communities and consequences across trophic levels, *Funct Ecol.*, 32, 1757–1769, <https://doi.org/10.1111/1365-2435.13063>, 2018.
- 885 Stocker, T. F., Qin, D., and et al.: *Climate Change 2013: The Physical Science Basis. Intergovernmental Panel on Climate Change, Working Group I Contribution to the IPCC Fifth Assessment Report (AR5)*, Cambridge University Press, Cambridge, United Kingdom and New York, NY, USA, <https://doi.org/10.1017/CBO9781107415324>, 2013.
- Sutton, M. A., Reis, S., Riddiek, S. N., Dragosits, U., Nemitz, E., Theobald, M. R., Tang, Y. S., Braban, C. F., Vieno, M., 890 Dore, A. J., Mitchell, R. F., Wanless, S., Daunt, F., Fowler, D., Blackall, T. D., Milford, C., Flechard, C. R., Loubet, B., Massad, R., Cellier, P., Personne, E., Coheur, P. F., Clarisse, L., Van Damme, M., Ngadi, Y., Clerbaux, C., Skjoth, C. A., Geels, C., Hertel, O., Wichink Kruit, R. J., Pinder, R. W., Bash, J. O., Walker, J. T., Simpson, D., Horváth, L., Misselbrook, T. H., Bleeker, A., Dentener, F., and de Vries, W.: Towards a climate dependent paradigm of ammonia emission and deposition, *Philosophical Transactions of the Royal Society B: Biological Sciences*, 368, 20130166, 895 <https://doi.org/10.1098/rstb.2013.0166>, 2013.
- Suzanne, N. A.: Agriculture Traditionnelle Et Échecs Des Politiques De Gestion Des Aires Protégées En Côte d'Ivoire: Le Cas De La Réserve De Lamto, *ESJ*, 12, 209, <https://doi.org/10.19044/esj.2016.v12n30p209>, 2016.
- Tang, Y. S., Braban, C. F., Dragosits, U., Simmons, I., Leaver, D., van Dijk, N., Poskitt, J., Thacker, S., Patel, M., Carter, H., Pereira, M. G., Keenan, P. O., Lawlor, A., Conolly, C., Vincent, K., Heal, M. R., and Sutton, M. A.: Acid-gases and aerosol 900 measurements in the UK (1999–2015): regional distributions and trends, *Atmos. Chem. Phys.*, 18, 16293–16324, <https://doi.org/10.5194/acp-18-16293-2018>, 2018a.

- 905 Fang, Y. S., Braban, C. F., Dragosits, U., Dore, A. J., Simmons, I., van Dijk, N., Poskitt, J., Dos Santos Pereira, G., Keenan, P. O., Conolly, C., Vincent, K., Smith, R. I., Heal, M. R., and Sutton, M. A.: Drivers for spatial, temporal and long-term trends in atmospheric ammonia and ammonium in the UK, *Atmos. Chem. Phys.*, 18, 705–733, <https://doi.org/10.5194/acp-18-705-2018>, 2018b.
- Tiemoko, T. D., Ramonet, M., Yoroba, F., Kouassi, K. B., Kouadio, K., Kazan, V., Kaiser, C., Truong, F., Vuillemin, C., Delmotte, M., Wastine, B., and Ciais, P.: Analysis of the temporal variability of CO<sub>2</sub>, CH<sub>4</sub> and CO concentrations at Lamto, West Africa, *Tellus B: Chemical and Physical Meteorology*, 73, 1–24, <https://doi.org/10.1080/16000889.2020.1863707>, 2021.
- 910 Vågen, T. G., Winowiecki, L. A., Tondoh, J. E., Desta, L. T., and Gumbrecht, T.: Mapping of soil properties and land degradation risk in Africa using MODIS reflectance, *Geoderma*, 263, 216–225, <https://doi.org/10.1016/j.geoderma.2015.06.023>, 2016.
- Van Damme, M., Clarisse, L., Heald, C. L., Hurtmans, D., Ngadi, Y., Clerbaux, C., Dolman, A. J., Erisman, J. W., and Coheur, P. F.: Global distributions, time series and error characterization of atmospheric ammonia (NH<sub>3</sub>) from IASI satellite observations, *Atmos. Chem. Phys.*, 14, 2905–2922, <https://doi.org/10.5194/acp-14-2905-2014>, 2014.
- 915 Van Damme, M., Clarisse, L., Dammers, E., Liu, X., Nowak, J. B., Clerbaux, C., Flechard, C. R., Galy-Lacaux, C., Xu, W., Neuman, J. A., Tang, Y. S., Sutton, M. A., Erisman, J. W., and Coheur, P. F.: Towards validation of ammonia (NH<sub>3</sub>) measurements from the IASI satellite, *Atmos. Meas. Tech.*, 8, 1575–1591, <https://doi.org/10.5194/amt-8-1575-2015>, 2015.
- Van Damme, M., Whitburn, S., Clarisse, L., Clerbaux, C., Hurtmans, D., and Coheur, P. F.: Version 2 of the IASI-NH<sub>3</sub>; neural network retrieval algorithm: near real-time and reanalysed datasets, *Atmos. Meas. Tech.*, 10, 4905–4914, <https://doi.org/10.5194/amt-10-4905-2017>, 2017.
- 920 Van Damme, M., Clarisse, L., Franco, B., Sutton, M. A., Erisman, J. W., Wichink-Kruit, R., van Zanten, M., Whitburn, S., Hadji-Lazaro, J., Hurtmans, D., Clerbaux, C., and Coheur, P. F.: Global, regional and national trends of atmospheric ammonia derived from a decadal (2008–2018) satellite record, *Environ. Res. Lett.*, <https://doi.org/10.1088/1748-9326/abd5e0>, 2020.
- 925 Van Damme, M., Clarisse, L., Franco, B., Sutton, M. A., Erisman, J. W., Wichink-Kruit, R., van Zanten, M., Whitburn, S., Hadji-Lazaro, J., Hurtmans, D., Clerbaux, C., and Coheur, P. F.: Global, regional and national trends of atmospheric ammonia derived from a decadal (2008–2018) satellite record, *Environ. Res. Lett.*, 16, 055017, <https://doi.org/10.1088/1748-9326/abd5e0>, 2021.
- Van Hove, L. W. A., Koops, A. J., Adema, E. H., Vredenberg, W. J., and Pieters, G. A.: Analysis of the uptake of atmospheric ammonia by leaves of *Phaseolus vulgaris* L., *Atmospheric Environment* (1967), 21, 1759–1763, [https://doi.org/10.1016/0004-6981\(87\)90115-6](https://doi.org/10.1016/0004-6981(87)90115-6), 1987.
- 930 Warner, J. X., Dickerson, R. R., Wei, Z., Strow, L. L., Wang, Y., and Liang, Q.: Increased atmospheric ammonia over the world's major agricultural areas detected from space, *Geophysical Research Letters*, 44, 2875–2884, <https://doi.org/10.1002/2016GL072305>, 2017.
- 935 van der Werf, G. R., Randerson, J. T., Giglio, L., van Leeuwen, T. T., Chen, Y., Rogers, B. M., Mu, M., van Marle, M. J. E., Morton, D. C., Collatz, G. J., Yokelson, R. J., and Kasibhatla, P. S.: Global fire emissions estimates during 1997–2016, *Earth Syst. Sci. Data*, 9, 697–720, <https://doi.org/10.5194/essd-9-697-2017>, 2017.
- Whitburn, S., Van Damme, M., Kaiser, J. W., van der Werf, G. R., Turquety, S., Hurtmans, D., Clarisse, L., Clerbaux, C., and Coheur, P. F.: Ammonia emissions in tropical biomass burning regions: Comparison between satellite-derived emissions and bottom-up fire inventories, *Atmospheric Environment*, 121, 42–54, <https://doi.org/10.1016/j.atmosenv.2015.03.015>, 2015a.

- 940 Whitburn, S., Van Damme, M., Kaiser, J. W., van der Werf, G. R., Turquety, S., Hurtmans, D., Clarisse, L., Clerbaux, C., and Coheur, P. F.: Ammonia emissions in tropical biomass burning regions: Comparison between satellite-derived emissions and bottom-up fire inventories, *Atmospheric Environment*, 121, 42–54, <https://doi.org/10.1016/j.atmosenv.2015.03.015>, 2015b.
- 945 Whitburn, S., Van Damme, M., Kaiser, J. W., van der Werf, G. R., Turquety, S., Hurtmans, D., Clarisse, L., Clerbaux, C., and Coheur, P. F.: Ammonia emissions in tropical biomass burning regions: Comparison between satellite-derived emissions and bottom-up fire inventories, *Atmospheric Environment*, 121, 42–54, <https://doi.org/10.1016/j.atmosenv.2015.03.015>, 2015c.
- Whitburn, S., Van Damme, M., Clarisse, L., Bauduin, S., Heald, C. L., Hadji-Lazaro, J., Hurtmans, D., Zondlo, M. A., Clerbaux, C., and Coheur, P. F.: A flexible and robust neural network IASI-NH<sub>3</sub> retrieval algorithm: New IASI-NH<sub>3</sub> NN Retrieval Algorithm, *Journal of Geophysical Research: Atmospheres*, 121, 6581–6599, <https://doi.org/10.1002/2016JD024828>, 2016.
- 950 Whitburn, S., Van Damme, M., Clarisse, L., Hurtmans, D., Clerbaux, C., and Coheur, P. F.: IASI-derived NH<sub>3</sub> enhancement ratios relative to CO for the tropical biomass burning regions, *Atmospheric Chemistry and Physics*, 17, 12239–12252, <https://doi.org/10.5194/acp-17-12239-2017>, 2017.
- 955 Yoboué, V., Galy-Lacaux, C., Lacaux, J. P., and Silué, S.: Rainwater Chemistry and Wet Deposition over the Wet Savanna Ecosystem of Lamto (Côte d'Ivoire), *Journal of Atmospheric Chemistry*, 52, 117–141, <https://doi.org/10.1007/s10874-005-0281-z>, 2005.
- Yue, S. and Wang, C.: The Mann-Kendall test modified by effective sample size to detect trend in serially correlated hydrological series, *Water Resources Management*, 18, 201–218, 2004.
- Yue, S., Pilon, P., and Cavadias, G.: Power of the Mann-Kendall and Spearman's rho tests for detecting monotonic trends in hydrological series, *Journal of hydrology*, 259, 254–271, 2002.
- 960 Zheng, B., Ciais, P., Chevallier, F., Chuvieco, E., Chen, Y., and Yang, H.: Increasing forest fire emissions despite the decline in global burned area, *Sci. Adv.*, 7, eabh2646, <https://doi.org/10.1126/sciadv.abh2646>, 2021.
- Abbadie, L. (Ed.): Lamto: structure, functioning, and dynamics of a savanna ecosystem, Springer Science+Business Media, New York, 415 pp., 2006.
- Addinsoft: XLSTAT statistical and data analysis solution. Paris, France. <https://www.xlstat.com/fr>, 2022.
- 965 Adon, M., Galy-Lacaux, C., Yoboué, V., Delon, C., Lacaux, J. P., Castera, P., Gardrat, E., Pienaar, J., Al Ourabi, H., Laouali, D., Diop, B., Sigha-Nkamdjou, L., Akpo, A., Tathy, J. P., Lavenu, F., and Mougin, E.: Long term measurements of sulfur dioxide, nitrogen dioxide, ammonia, nitric acid and ozone in west and central African ecosystems using passive samplers, *Atmospheric Chemistry and Physics*, 10, 7467–7487, <https://doi.org/10.5194/acp-10-7467-2010>, 2010.
- 970 Adon, M., Galy-Lacaux, C., Delon, C., Yoboué, V., Solmon, F., and Kaptue Tchuenta, A. T.: Dry deposition of nitrogen compounds (NO<sub>2</sub>, NO<sub>x</sub>, NH<sub>3</sub>), sulfur dioxide and ozone in west and central African ecosystems using the inferential method, *Atmospheric Chemistry and Physics*, 13, 11351–11374, <https://doi.org/10.5194/acp-13-11351-2013>, 2013.
- Akpo, A. B., Galy-Lacaux, C., Laouali, D., Delon, C., Lioussé, C., Adon, M., Gardrat, E., Mariscal, A., and Darakpa, C.: Precipitation chemistry and wet deposition in a remote wet savanna site in West Africa: Djougou (Benin), *Atmospheric Environment*, 115, 110–123, <https://doi.org/10.1016/j.atmosenv.2015.04.064>, 2015.
- 975 Andreae, M. O. and Merlet, P.: Emission of trace gases and aerosols from biomass burning, *Global Biogeochemical Cycles*, 15, 955–966, <https://doi.org/10.1029/2000GB001382>, 2001.

Mis en forme : Espace Après : 12 pt, Interligne : simple



Baek, B. H., Aneja, V. P., and Tong, Q.: Chemical coupling between ammonia, acid gases, and fine particles, *Environ. Pollut.*, 129, 89–98, 2004.

980 Bahino, J., Yoboué, V., Galy-Lacaux, C., Adon, M., Akpo, A., Keita, S., Liousse, C., Gardrat, E., Chiron, C., Ossouhou, M., Gnamien, S., and Djossou, J.: A pilot study of gaseous pollutants' measurement (NO<sub>2</sub>, SO<sub>2</sub>, NH<sub>3</sub>, HNO<sub>3</sub> and O<sub>3</sub>) in Abidjan, Côte d'Ivoire: contribution to an overview of gaseous pollution in African cities, *Atmospheric Chemistry and Physics*, 18, 5173–5198, <https://doi.org/10.5194/acp-18-5173-2018>, 2018.

985 Beale, C. A., Paulot, F., Randles, C. A., Wang, R., Guo, X., Clarisse, L., Van Damme, M., Coheur, P.-F., Clerbaux, C., Shephard, M. W., Dammers, E., Cady-Pereira, K., and Zondlo, M. A.: Large sub-regional differences of ammonia seasonal patterns over India reveal inventory discrepancies, *Environ. Res. Lett.*, 17, 104006, <https://doi.org/10.1088/1748-9326/ac881f>, 2022.

Behera, S. N., Sharma, M., Aneja, V. P., and Balasubramanian, R.: Ammonia in the atmosphere: a review on emission sources, atmospheric chemistry and deposition on terrestrial bodies, *Environ Sci Pollut Res*, 20, 8092–8131, <https://doi.org/10.1007/s11356-013-2051-9>, 2013.

990 Beusen, A. H. W., Bouwman, A. F., Heuberger, P. S. C., Van Drecht, G., and Van Der Hoek, K. W.: Bottom-up uncertainty estimates of global ammonia emissions from global agricultural production systems, *Atmospheric Environment*, 42, 6067–6077, <https://doi.org/10.1016/j.atmosenv.2008.03.044>, 2008.

995 Bouwman, A. F. and Van Der Hoek, K. W.: Scenarios of animal waste production and fertilizer use and associated ammonia emission for the developing countries, *Atmospheric Environment*, 31, 4095–4102, [https://doi.org/10.1016/S1352-2310\(97\)00288-4](https://doi.org/10.1016/S1352-2310(97)00288-4), 1997.

Bouwman, A. F., Lee, D. S., Asman, W. A. H., Dentener, F. J., Van Der Hoek, K. W., and Olivier, J. G. J.: A global high-resolution emission inventory for ammonia, *Global Biogeochemical Cycles*, 11, 561–587, <https://doi.org/10.1029/97GB02266>, 1997.

1000 Bouwman, A. F., Van Vuuren, D. P., Derwent, R. G., and Posch, M.: A Global Analysis of Acidification and Eutrophication of Terrestrial Ecosystems, *Water, Air, and Soil Pollution*, 141, 349–382, <https://doi.org/10.1023/A:1021398008726>, 2002a.

Bouwman, A. F., Boumans, L. J. M., and Batjes, N. H.: Estimation of global NH<sub>3</sub> volatilization loss from synthetic fertilizers and animal manure applied to arable lands and grasslands: AMMONIA EMISSION FROM FERTILIZERS, *Global Biogeochem. Cycles*, 16, 8-1-8–14, <https://doi.org/10.1029/2000GB001389>, 2002b.

1005 Clarisse, L., Clerbaux, C., Dentener, F., Hurtmans, D., and Coheur, P.-F.: Global ammonia distribution derived from infrared satellite observations, *Nature Geosci*, 2, 479–483, <https://doi.org/10.1038/ngeo551>, 2009.

Clarisse, L., Shephard, M. W., Dentener, F., Hurtmans, D., Cady-Pereira, K., Karagulian, F., Van Damme, M., Clerbaux, C., and Coheur, P.-F.: Satellite monitoring of ammonia: A case study of the San Joaquin Valley, *J. Geophys. Res.*, 115, D13302, <https://doi.org/10.1029/2009JD013291>, 2010.

1010 Clarisse, L., Van Damme, M., Gardner, W., Coheur, P.-F., Clerbaux, C., Whitburn, S., Hadji-Lazaro, J., and Hurtmans, D.: Atmospheric ammonia (NH<sub>3</sub>) emanations from Lake Natron's saline mudflats, *Sci Rep*, 9, 4441, <https://doi.org/10.1038/s41598-019-39935-3>, 2019.

Coheur, P.-F., Clarisse, L., Turquety, S., Hurtmans, D., and Clerbaux, C.: IASI measurements of reactive trace species in biomass burning plumes, *Atmospheric Chemistry and Physics*, 9, 5655–5667, <https://doi.org/10.5194/acp-9-5655-2009>, 2009.

- 1015 Crutzen, P. J. and Andreae, M. O.: Biomass Burning in the Tropics: Impact on Atmospheric Chemistry and Biogeochemical Cycles. *Science*, 250, 1669–1678. <https://doi.org/10.1126/science.250.4988.1669>, 1990.
- Dammers, E., Shephard, M. W., Palm, M., Cady-Pereira, K., Capps, S., Lutsch, E., Strong, K., Hannigan, J. W., Ortega, I., Toon, G. C., Stremme, W., Grutter, M., Jones, N., Smale, D., Siemons, J., Hrpcek, K., Tremblay, D., Schaap, M., Notholt, J., and Erisman, J. W.: Validation of the CrIS fast physical NH<sub>3</sub>; retrieval with ground-based FTIR. *Atmos. Meas. Tech.*, 10, 2645–2667. <https://doi.org/10.5194/amt-10-2645-2017>, 2017.
- 1020 Delmas, R., Lacaux, J. P., Menaut, J. C., Abbadie, L., Le Roux, X., Helas, G., and Lobert, J.: Nitrogen compound emission from biomass burning in tropical African savanna FOS/DECAFE 1991 experiment (Lamto, Ivory Coast). *J Atmos Chem*, 22, 175–193. <https://doi.org/10.1007/BF00708188>, 1995.
- Delon, C., Galy-Lacaux, C., Boone, A., Lioussé, C., Serça, D., Adon, M., Diop, B., Akpo, A., Lavenu, F., Mougín, E., and others: Atmospheric nitrogen budget in Sahelian dry savannas. *Atmospheric Chemistry and Physics*, 10, 2691–2708, 2010.
- 1025 Delon, C., Galy-Lacaux, C., Adon, M., Lioussé, C., Serça, D., Diop, B., and Akpo, A.: Nitrogen compounds emission and deposition in West African ecosystems: comparison between wet and dry savanna. *Biogeosciences*, 9, 385–402. <https://doi.org/10.5194/bg-9-385-2012>, 2012.
- Delon, C., Galy-Lacaux, C., Serça, D., Loubet, B., Camara, N., Gardrat, E., Saneh, I., Fensholt, R., Tagesson, T., Le Dantec, V., Sambou, B., Diop, C., and Mougín, E.: Soil and vegetation-atmosphere exchange of NO, NH<sub>3</sub>, and N<sub>2</sub>O from field measurements in a semi arid grazed ecosystem in Senegal. *Atmospheric Environment*, 156, 36–51. <https://doi.org/10.1016/j.atmosenv.2017.02.024>, 2017.
- 1030 Delon, C., Galy-Lacaux, C., Serça, D., Personne, E., Mougín, E., Adon, M., Le Dantec, V., Loubet, B., Fensholt, R., and Tagesson, T.: Modelling land–atmosphere daily exchanges of NO, NH<sub>3</sub>, and CO<sub>2</sub> in a semi-arid grazed ecosystem in Senegal. *Biogeosciences*, 16, 2049–2077. <https://doi.org/10.5194/bg-16-2049-2019>, 2019.
- 1035 Diawara, A., Yoroba, F., Kouadio, K. Y., Kouassi, K. B., Assamoi, E. M., Diedhiou, A., and Assamoi, P.: Climate Variability in the Sudano-Guinean Transition Area and Its Impact on Vegetation: The Case of the Lamto Region in Côte D'Ivoire. *Advances in Meteorology*, 2014, 1–11. <https://doi.org/10.1155/2014/831414>, 2014.
- Erisman, J. W., Galloway, J. N., Seitzinger, S., Bleeker, A., Dise, N. B., Petrescu, A. M. R., Leach, A. M., and de Vries, W.: Consequences of human modification of the global nitrogen cycle. *Phil. Trans. R. Soc. B*, 368, 20130116. <https://doi.org/10.1098/rstb.2013.0116>, 2013.
- 1040 Feng, L., Smith, S. J., Braun, C., Crippa, M., Gidden, M. J., Hoesly, R., Klimont, Z., van Marle, M., van den Berg, M., and van der Werf, G. R.: Gridded Emissions for CMIP6. *Climate and Earth System Modeling*. <https://doi.org/10.5194/gmd-2019-195>, 2019.
- Ferm, M.: A sensitive Diffusional Sampler., IVL publication B – 1020, 1–12, 1991.
- 1045 Fowler, D., Sutton, M. A., Smith, R. I., Pitcairn, C. E. R., Coyle, M., Campbell, G., and Stedman, J.: Regional mass budgets of oxidized and reduced nitrogen and their relative contribution to the nitrogen inputs of sensitive ecosystems. *Environmental Pollution*, 102, 337–342. [https://doi.org/10.1016/S0269-7491\(98\)80052-3](https://doi.org/10.1016/S0269-7491(98)80052-3), 1998.
- 1050 Galloway, J. N., Dentener, F. J., Capone, D. G., Boyer, E. W., Howarth, R. W., Seitzinger, S. P., Asner, G. P., Cleveland, C. C., Green, P. A., Holland, E. A., Karl, D. M., Michaels, A. F., Porter, J. H., Townsend, A. R., and Vöösmary, C. J.: Nitrogen Cycles: Past, Present, and Future. *Biogeochemistry*, 70, 153–226. <https://doi.org/10.1007/s10533-004-0370-0>, 2004.

Giglio, L., Randerson, J. T., van der Werf, G. R., Kasibhatla, P. S., Collatz, G. J., Morton, D. C., and DeFries, R. S.: Assessing variability and long-term trends in burned area by merging multiple satellite fire products, *Biogeosciences*, 7, 1171–1186, <https://doi.org/10.5194/bg-7-1171-2010>, 2010.

1055 Giglio, L., Randerson, J. T., and van der Werf, G. R.: Analysis of daily, monthly, and annual burned area using the fourth-generation global fire emissions database (GFED4): ANALYSIS OF BURNED AREA, *Journal of Geophysical Research: Biogeosciences*, 118, 317–328, <https://doi.org/10.1002/jgrg.20042>, 2013.

1060 Guo, X., Wang, R., Pan, D., Zondlo, M. A., Clarisse, L., Van Damme, M., Whitburn, S., Coheur, P., Clerbaux, C., Franco, B., Golston, L. M., Wendt, L., Sun, K., Tao, L., Miller, D., Mikoviny, T., Müller, M., Wisthaler, A., Tevlin, A. G., Murphy, J. G., Nowak, J. B., Roscioli, J. R., Volkamer, R., Kille, N., Neuman, J. A., Eilerman, S. J., Crawford, J. H., Yacovitch, T. I., Barrick, J. D., and Scarino, A. J.: Validation of IASI Satellite Ammonia Observations at the Pixel Scale Using In Situ Vertical Profiles, *JGR Atmospheres*, 126, <https://doi.org/10.1029/2020JD033475>, 2021.

Hickman, J. E., Dammers, E., Galy-Lacaux, C., and van der Werf, G. R.: Satellite evidence of substantial rain-induced soil emissions of ammonia across the Sahel, *Atmospheric Chemistry and Physics*, 18, 16713–16727, <https://doi.org/10.5194/acp-18-16713-2018>, 2018.

1065 Hickman, J. E., Andela, N., Dammers, E., Clarisse, L., Coheur, P.-F., Damme, M. V., Vittorio, C. A. D., Ossouhou, M., Galy-Lacaux, C., Tsigaridis, K., and Bauer, S. E.: Changes in biomass burning, wetland extent, or agriculture drive atmospheric NH<sub>3</sub> trends in select African regions, *Atmos. Chem. Phys.*, 15, 2021.

Hirsch, R. M., Slack, J. R., and Smith, R. A.: Techniques of trend analysis for monthly water quality data, *Water Resour. Res.*, 18, 107–121, <https://doi.org/10.1029/WR018i001p0107>, 1982.

1070 Hoesly, R. M., Smith, S. J., Feng, L., Klimont, Z., Janssens-Maenhout, G., Pitkanen, T., Seibert, J. J., Vu, L., Andres, R. J., Bolt, R. M., Bond, T. C., Dawidowski, L., Kholod, N., Kurokawa, J., Li, M., Liu, L., Lu, Z., Moura, M. C. P., O'Rourke, P. R., and Zhang, Q.: Historical (1750–2014) anthropogenic emissions of reactive gases and aerosols from the Community Emissions Data System (CEDS), *Geosci. Model Dev.*, 11, 369–408, <https://doi.org/10.5194/gmd-11-369-2018>, 2018.

1075 Huffman, G. J., Bolvin, D. T., Nelkin, E. J., Wolff, D. B., Adler, R. F., Gu, G., Hong, Y., Bowman, K. P., and Stocker, E. F.: The TRMM Multisatellite Precipitation Analysis (TMPA): Quasi-Global, Multiyear, Combined-Sensor Precipitation Estimates at Fine Scales, *Journal of Hydrometeorology*, 8, 38–55, <https://doi.org/10.1175/JHM560.1>, 2007.

Jaeglé, L., Martin, R. V., Chance, K., Steinberger, L., Kurosu, T. P., Jacob, D. J., Modi, A. I., Yoboué, V., Sigha-Nkamdjou, L., and Galy-Lacaux, C.: Satellite mapping of rain-induced nitric oxide emissions from soils, *J. Geophys. Res.*, 109, D21310, <https://doi.org/10.1029/2004JD004787>, 2004.

1080 Kendall, M. G.: Rank Correlation Methods, 4th ed., Charles Griffin: London, 1975.

Koziel, J. A., Aneja, V. P., and Baek, B.-H.: Gas-to-Particle Conversion Process between Ammonia, Acid Gases, and Fine Particles in the Atmosphere, 26, 2006.

1085 Kumar, M., Parmar, K. S., Kumar, D. B., Mhawish, A., Broday, D. M., Mall, R. K., and Banerjee, T.: Long-term aerosol climatology over Indo-Gangetic Plain: Trend, prediction and potential source fields, *Atmospheric Environment*, 180, 37–50, <https://doi.org/10.1016/j.atmosenv.2018.02.027>, 2018.

Le Roux, X., Abbadie, L., Fritz, H., and Leriche, H.: Modification of the Savanna Functioning by Herbivores, in: Lamto, vol. 179, edited by: Abbadie, L., Gignoux, J., Le Roux, X., and Lepage, M., Springer New York, New York, NY, 185–198, [https://doi.org/10.1007/978-0-387-33857-6\\_10](https://doi.org/10.1007/978-0-387-33857-6_10), 2006.

Levine, J. S. (Ed.): Biomass burning and global change. MIT Press, Cambridge, Mass, 2 pp., 1996.

1090 Lobert, J. M., Scharffe, D. H., Hao, W. M., and Crutzen, P. J.: Importance of biomass burning in the atmospheric budgets of nitrogen-containing gases, *Nature*, 346, 552–554, <https://doi.org/10.1038/346552a0>, 1990.

1095 Lutsch, E., Strong, K., Jones, D. B. A., Ortega, I., Hannigan, J. W., Dammers, E., Shephard, M. W., Morris, E., Murphy, K., Evans, M. J., Parrington, M., Whitburn, S., Van Damme, M., Clarisse, L., Coheur, P., Clerbaux, C., Croft, B., Martin, R. V., Pierce, J. R., and Fisher, J. A.: Unprecedented Atmospheric Ammonia Concentrations Detected in the High Arctic From the 2017 Canadian Wildfires, *J. Geophys. Res. Atmos.*, 124, 8178–8202, <https://doi.org/10.1029/2019JD030419>, 2019.

Malm, W. C., Schichtel, B. A., Pitchford, M. L., Ashbaugh, L. L., and Eldred, R. A.: Spatial and monthly trends in speciated fine particle concentration in the United States: SPECIATED FINE PARTICLE CONCENTRATION, *J. Geophys. Res.*, 109, n/a-n/a, <https://doi.org/10.1029/2003JD003739>, 2004.

Mann, H. B.: Nonparametric Tests Against Trend, *Econometrica*, 13, 245–259, <https://doi.org/10.2307/1907187>, 1945.

1100 Mayaux, P., Bartholomé, E., Fritz, S., and Belward, A.: A new land-cover map of Africa for the year 2000: New land-cover map of Africa, *Journal of Biogeography*, 31, 861–877, <https://doi.org/10.1111/j.1365-2699.2004.01073.x>, 2004.

McCalley, C. K. and Sparks, J. P.: Controls over nitric oxide and ammonia emissions from Mojave Desert soils, *Oecologia*, 156, 871–881, <https://doi.org/10.1007/s00442-008-1031-0>, 2008.

1105 Mitani, M., Yamagiwa, J., Oko, R. A., Moutsamboté, J.-M., Yumoto, T., and Maruhashi, T.: Approaches in Density Estimates and Reconstruction of Social Groups in a Western Lowland Gorilla Population in the Ndoki Forest, Northern Congo., *Tropics*, 2, 219–229, <https://doi.org/10.3759/tropics.2.219>, 1993.

1110 Nicholson, S. E., Some, B., McCollum, J., Nelkin, E., Klotter, D., Berte, Y., Diallo, B. M., Gaye, I., Kpabebe, G., Ndiaye, O., Noukpozoukhou, J. N., Tanu, M. M., Thiam, A., Toure, A. A., and Traore, A. K.: Validation of TRMM and Other Rainfall Estimates with a High-Density Gauge Dataset for West Africa. Part I: Validation of GPCC Rainfall Product and Pre-TRMM Satellite and Blended Products, *Journal of Applied Meteorology*, 42, 1337–1354, [https://doi.org/10.1175/1520-0450\(2003\)042<1337:VOTAOR>2.0.CO;2](https://doi.org/10.1175/1520-0450(2003)042<1337:VOTAOR>2.0.CO;2), 2003.

O'Rourke, P., Smith, S., Mott, A., Ahsan, H., McDuffie, E., Crippa, M., Klimont, Z., McDonald, B., Wang, S., Nicholson, M., Hoesly, R., and Feng, L.: CEDS v. 2021\_04\_21 Gridded emissions data, <https://doi.org/10.25584/PNNLDATAHUB/1779095>, 2021.

1115 Ossohou, M., Galy-Lacaux, C., Yoboué, V., Hickman, J. E., Gardrat, E., Adon, M., Darras, S., Laouali, D., Akpo, A., Ouafu, M., Diop, B., and Opepa, C.: Trends and seasonal variability of atmospheric NO<sub>2</sub> and HNO<sub>3</sub> concentrations across three major African biomes inferred from long-term series of ground-based and satellite measurements, *Atmospheric Environment*, 207, 148–166, <https://doi.org/10.1016/j.atmosenv.2019.03.027>, 2019.

1120 Ossohou, M., Galy-Lacaux, C., Yoboué, V., Adon, M., Delon, C., Gardrat, E., Konaté, I., Ki, A., and Zouzou, R.: Long-term atmospheric inorganic nitrogen deposition in West African savanna over 16 year period (Lamto, Côte d'Ivoire), *Environ. Res. Lett.*, 16, 015004, <https://doi.org/10.1088/1748-9326/abd065>, 2020.

Ouafu-Leumbe, M.-R., Galy-Lacaux, C., Liousse, C., Pont, V., Akpo, A., Doumbia, T., Gardrat, E., Zouiten, C., Sigha-Nkamdjou, L., and Ekodeck, G. E.: Chemical composition and sources of atmospheric aerosols at Djougou (Benin), *Meteorol Atmos Phys*, 130, 591–609, <https://doi.org/10.1007/s00703-017-0538-5>, 2018.

125 [Pinder, R. W., Davidson, E. A., Goodale, C. L., Greaver, T. L., Herrick, J. D., and Liu, L.: Climate change impacts of US reactive nitrogen, \*Proceedings of the National Academy of Sciences\*, 109, 7671–7675, <https://doi.org/10.1073/pnas.1114243109>, 2012.](#)

[R Core Team: R: A Language and Environment for Statistical Computing. R Foundation for Statistical Computing, Vienna, Austria. URL <https://www.R-project.org/>, <https://www.R-project.org/>, 2021.](#)

130 [de Rouw, A. and Rajot, J.-L.: Soil organic matter, surface crusting and erosion in Sahelian farming systems based on manuring or fallowing, \*Agriculture, Ecosystems & Environment\*, 104, 263–276, <https://doi.org/10.1016/j.agee.2003.12.020>, 2004.](#)

[Sen: Estimates of the Regression Coefficient Based on Kendall's Tau., \*J Am Stat Assoc\*, 63, 1379–1389, 1968.](#)

135 [Shadmani, M., Marofi, S., and Roknian, M.: Trend Analysis in Reference Evapotranspiration Using Mann-Kendall and Spearman's Rho Tests in Arid Regions of Iran, \*Water Resources Management\*, 26, 211–224, <https://doi.org/10.1007/s11269-011-9913-z>, 2012.](#)

[Shi, Y., Matsunaga, T., and Yamaguchi, Y.: High-Resolution Mapping of Biomass Burning Emissions in Three Tropical Regions, \*Environ. Sci. Technol.\*, 49, 10806–10814, <https://doi.org/10.1021/acs.est.5b01598>, 2015.](#)

140 [Sigha, -Nkamdjou L., Galy-Lacaux, C., Pont, V., Richard, S., Sighomnou, D., and Lacaux, J. P.: Rainwater Chemistry and Wet Deposition over the Equatorial Forested Ecosystem of Zoétélé \(Cameroon\), \*J. Atmos. Chem.\*, 46, 173–198, <https://doi.org/10.1023/A:1026057413640>, 2003.](#)

[Smith, J. S., Zhou, Y., Kyle, P., Wang, H., and Yu, H.: A Community Emissions Data System \(CEDS\): Emissions For CMIP6 and Beyond, \*International Emission Inventory Conference 101\*, 19395–19409, 2015.](#)

145 [Soper, F. M., Groffman, P. M., and Sparks, J. P.: Denitrification in a subtropical, semi-arid North American savanna: field measurements and intact soil core incubations, \*Biogeochemistry\*, 128, 257–266, <https://doi.org/10.1007/s10533-016-0205-9>, 2016.](#)

[Stevens, C. J., David, T. I., and Storkey, J.: Atmospheric nitrogen deposition in terrestrial ecosystems: Its impact on plant communities and consequences across trophic levels, \*Funct Ecol\*, 32, 1757–1769, <https://doi.org/10.1111/1365-2435.13063>, 2018.](#)

150 [Stocker, T. F., Qin, D., and et al.: Climate Change 2013 : The Physical Science Basis. Intergovernmental Panel on Climate Change, Working Group I Contribution to the IPCC Fifth Assessment Report \(AR5\), Cambridge University Press, Cambridge, United Kingdom and New York, NY, USA, <https://doi.org/10.1017/CBO9781107415324>, 2013.](#)

155 [Sutton, M. A., Reis, S., Riddick, S. N., Dragosits, U., Nemitz, E., Theobald, M. R., Tang, Y. S., Braban, C. F., Vieno, M., Dore, A. J., Mitchell, R. F., Wanless, S., Daunt, F., Fowler, D., Blackall, T. D., Milford, C., Flechard, C. R., Loubet, B., Massad, R., Cellier, P., Personne, E., Coheur, P. F., Clarisse, L., Van Damme, M., Ngadi, Y., Clerbaux, C., Skjøth, C. A., Geels, C., Hertel, O., Wichink Kruit, R. J., Pinder, R. W., Bash, J. O., Walker, J. T., Simpson, D., Horváth, L., Misselbrook, T. H., Bleeker, A., Dentener, F., and de Vries, W.: Towards a climate-dependent paradigm of ammonia emission and deposition, \*Philosophical Transactions of the Royal Society B: Biological Sciences\*, 368, 20130166, <https://doi.org/10.1098/rstb.2013.0166>, 2013.](#)

160 [Suzanne, N. A.: Agriculture Traditionnelle Et Échecs Des Politiques De Gestion Des Aires Protégées En Côte d'Ivoire : Le Cas De La Réserve De Lamto, \*ESJ\*, 12, 209, <https://doi.org/10.19044/esj.2016.v12n30p209>, 2016.](#)

Tang, Y. S., Braban, C. F., Dragosits, U., Simmons, I., Leaver, D., van Dijk, N., Poskitt, J., Thacker, S., Patel, M., Carter, H., Pereira, M. G., Keenan, P. O., Lawlor, A., Conolly, C., Vincent, K., Heal, M. R., and Sutton, M. A.: Acid gases and aerosol measurements in the UK (1999–2015): regional distributions and trends, *Atmos. Chem. Phys.*, 18, 16293–16324, <https://doi.org/10.5194/acp-18-16293-2018>, 2018a.

165 Tang, Y. S., Braban, C. F., Dragosits, U., Dore, A. J., Simmons, I., van Dijk, N., Poskitt, J., Dos Santos Pereira, G., Keenan, P. O., Conolly, C., Vincent, K., Smith, R. I., Heal, M. R., and Sutton, M. A.: Drivers for spatial, temporal and long-term trends in atmospheric ammonia and ammonium in the UK, *Atmos. Chem. Phys.*, 18, 705–733, <https://doi.org/10.5194/acp-18-705-2018>, 2018b.

170 Tiemoko, T. D., Ramonet, M., Yoroba, F., Kouassi, K. B., Kouadio, K., Kazan, V., Kaiser, C., Truong, F., Vuillemin, C., Delmotte, M., Wastine, B., and Ciais, P.: Analysis of the temporal variability of CO<sub>2</sub>, CH<sub>4</sub> and CO concentrations at Lamto, West Africa, *Tellus B: Chemical and Physical Meteorology*, 73, 1–24, <https://doi.org/10.1080/16000889.2020.1863707>, 2021.

Vågen, T.-G., Winowiecki, L. A., Tondoh, J. E., Desta, L. T., and Gumbricht, T.: Mapping of soil properties and land degradation risk in Africa using MODIS reflectance, *Geoderma*, 263, 216–225, <https://doi.org/10.1016/j.geoderma.2015.06.023>, 2016.

175 Van Damme, M., Clarisse, L., Heald, C. L., Hurtmans, D., Ngadi, Y., Clerbaux, C., Dolman, A. J., Erismann, J. W., and Coheur, P. F.: Global distributions, time series and error characterization of atmospheric ammonia (NH<sub>3</sub>) from IASI satellite observations, *Atmos. Chem. Phys.*, 14, 2905–2922, <https://doi.org/10.5194/acp-14-2905-2014>, 2014.

180 Van Damme, M., Clarisse, L., Dammers, E., Liu, X., Nowak, J. B., Clerbaux, C., Flechard, C. R., Galy-Lacaux, C., Xu, W., Neuman, J. A., Tang, Y. S., Sutton, M. A., Erismann, J. W., and Coheur, P. F.: Towards validation of ammonia (NH<sub>3</sub>) measurements from the IASI satellite, *Atmos. Meas. Tech.*, 8, 1575–1591, <https://doi.org/10.5194/amt-8-1575-2015>, 2015.

Van Damme, M., Whitburn, S., Clarisse, L., Clerbaux, C., Hurtmans, D., and Coheur, P.-F.: Version 2 of the IASI NH<sub>3</sub>: neural network retrieval algorithm: near-real-time and reanalysed datasets, *Atmos. Meas. Tech.*, 10, 4905–4914, <https://doi.org/10.5194/amt-10-4905-2017>, 2017.

185 Van Damme, M., Clarisse, L., Franco, B., Sutton, M. A., Erismann, J. W., Wichink Kruit, R., van Zanten, M., Whitburn, S., Hadji-Lazaro, J., Hurtmans, D., Clerbaux, C., and Coheur, P.-F.: Global, regional and national trends of atmospheric ammonia derived from a decadal (2008–2018) satellite record, *Environ. Res. Lett.*, <https://doi.org/10.1088/1748-9326/abd5e0>, 2020.

190 Van Damme, M., Clarisse, L., Franco, B., Sutton, M. A., Erismann, J. W., Wichink Kruit, R., van Zanten, M., Whitburn, S., Hadji-Lazaro, J., Hurtmans, D., Clerbaux, C., and Coheur, P.-F.: Global, regional and national trends of atmospheric ammonia derived from a decadal (2008–2018) satellite record, *Environ. Res. Lett.*, 16, 055017, <https://doi.org/10.1088/1748-9326/abd5e0>, 2021.

Van Hove, L. W. A., Koops, A. J., Adema, E. H., Vredenberg, W. J., and Pieters, G. A.: Analysis of the uptake of atmospheric ammonia by leaves of *Phaseolus vulgaris* L., *Atmospheric Environment* (1967), 21, 1759–1763, [https://doi.org/10.1016/0004-6981\(87\)90115-6](https://doi.org/10.1016/0004-6981(87)90115-6), 1987.

195 Warner, J. X., Dickerson, R. R., Wei, Z., Strow, L. L., Wang, Y., and Liang, Q.: Increased atmospheric ammonia over the world's major agricultural areas detected from space, *Geophysical Research Letters*, 44, 2875–2884, <https://doi.org/10.1002/2016GL072305>, 2017.

van der Werf, G. R., Randerson, J. T., Giglio, L., van Leeuwen, T. T., Chen, Y., Rogers, B. M., Mu, M., van Marle, M. J. E., Morton, D. C., Collatz, G. J., Yokelson, R. J., and Kasibhatla, P. S.: Global fire emissions estimates during 1997–2016, *Earth Syst. Sci. Data*, 9, 697–720, <https://doi.org/10.5194/essd-9-697-2017>, 2017.

- 200 [Whitburn, S., Van Damme, M., Kaiser, J. W., van der Werf, G. R., Turquety, S., Hurtmans, D., Clarisse, L., Clerbaux, C., and Coheur, P.-F.: Ammonia emissions in tropical biomass burning regions: Comparison between satellite-derived emissions and bottom-up fire inventories, \*Atmospheric Environment\*, 121, 42–54, <https://doi.org/10.1016/j.atmosenv.2015.03.015>, 2015.](#)
- 205 [Whitburn, S., Van Damme, M., Clarisse, L., Bauduin, S., Heald, C. L., Hadji-Lazaro, J., Hurtmans, D., Zondlo, M. A., Clerbaux, C., and Coheur, P.-F.: A flexible and robust neural network IASI-NH<sub>3</sub> retrieval algorithm: New IASI-NH<sub>3</sub> NN Retrieval Algorithm, \*Journal of Geophysical Research: Atmospheres\*, 121, 6581–6599, <https://doi.org/10.1002/2016JD024828>, 2016.](#)
- [Whitburn, S., Van Damme, M., Clarisse, L., Hurtmans, D., Clerbaux, C., and Coheur, P.-F.: IASI-derived NH<sub>3</sub> enhancement ratios relative to CO for the tropical biomass burning regions, \*Atmospheric Chemistry and Physics\*, 17, 12239–12252, <https://doi.org/10.5194/acp-17-12239-2017>, 2017.](#)
- 210 [Yoboué, V., Galy-Lacaux, C., Lacaux, J. P., and Silué, S.: Rainwater Chemistry and Wet Deposition over the Wet Savanna Ecosystem of Lamto \(Côte d'Ivoire\), \*Journal of Atmospheric Chemistry\*, 52, 117–141, <https://doi.org/10.1007/s10874-005-0281-z>, 2005.](#)
- [Yue, S. and Wang, C.: The Mann-Kendall test modified by effective sample size to detect trend in serially correlated hydrological series, \*Water Resources Management\*, 18, 201–218, 2004.](#)
- 215 [Yue, S., Pilon, P., and Cavadias, G.: Power of the Mann–Kendall and Spearman's rho tests for detecting monotonic trends in hydrological series, \*Journal of hydrology\*, 259, 254–271, 2002.](#)
- [Zheng, B., Ciaï, P., Chevallier, F., Chuvieco, E., Chen, Y., and Yang, H.: Increasing forest fire emissions despite the decline in global burned area, \*Sci. Adv.\*, 7, eabh2646, <https://doi.org/10.1126/sciadv.abh2646>, 2021.](#)

Mis en forme : Espace Après : 12 pt
